# Supplementary material for: Aboveground carbon of community-managed Chirpine (Pinus roxburghii Sarg.) forests of Nepal based on stand types and geographic aspects
Source: PeerJ. 2019 Mar 8;7:e6494. doi: 10.7717/peerj.6494 (PMC6410687; doi:10.7717/peerj.6494)
Supplement: Supplemental Information 5 [file peerj-07-6494-s005.xls]

## Sheet: Information
1	Allometric equation
	ln_Vol= a+b ln_DBH+c ln_Height (Source: Sharma $ Pukkala, 1990
	Chirpine	Chilaune	Miscellaneous Hill species
a	-2.977	-2.7385	-2.3204
b	1.9235	1.8155	1.8507
c	1.0019	1.0072	0.8223
R2	99.2	98.3	97.7
Note: For Katus, Paiyu, Tiju and Hadekafal equation of miscellaneous hill species was used
2	Wood Density
SN	Species	Scientific name	Density (kg/m3)	Density (g/cm3)
1	Chirpine	Pinus roxburghii	650	0.65
2	Chilaune	Schima wallichii	690	0.69
3	Katus	Castanopsis spp.	740	0.74
4	Hadekafal	Myrica esculenta	750	0.75
(Source: Jackson, 1994, MPFS, 1988)
3	% Carbon in biomass
SN	Species	Leaf	Wood	Sources
1	Chirpine	0.4346	0.4632	Negi et al., 2003
2	Chilaune	0.4352	0.4505	Negi et al., 2003
3	Others	0.47	0.47	McGroddy et al. 2004 as in IPCC, 2006
4	Biomass ratio
			Reprod/ Pole (<28cm)	Small timber (28-53cm)	Large timber (>=53cm)	Average	Source
1	Chirpine	Branches	0.189	0.256	0.3	0.248333	(MPFS, 1988)
	Chirpine	Leaves	0.101	0.046	0.033	0.06	(MPFS, 1988)
2	Chilaune	Branches	0.52	0.186	0.168	0.291333	(MPFS, 1988)
	Chilaune	Leaves	0.064	0.035	0.033	0.044	(MPFS, 1988)
3	Katus	Branches	0.398	0.915	1.496	0.936333	(MPFS, 1988)
	Katus	Leaves	0.053	0.048	0.042	0.0476667	(MPFS, 1988)
4	Hadekafal	Branches	0.524	0.59	0.605	0.573	(MPFS, 1988)
	Hadekafal	Leaves	0.17	0.16	0.155	0.161667	(MPFS, 1988)
5		Roots	0.275	of Aboveground biomass	Mokany et al., 2006
6	Plot size
SN	Description	m2	ha
1	Tree (>5cm dbh)	500	0.05
2	Sapling (<5cm dbh)	100	0.01
2	Understorey	1	0.0001
Plot ID	Community Forest name	Stand type	Altitude	Aspect
1	Bayardanda	Mixed	< 1000	SW
2	Lamakhora	Monospecific	< 1000	SE
3	Bayardanda	Monospecific	1000 - 1300	NE
4	Koldanda	Monospecific	< 1000	SW
5	Koldanda	Mixed	< 1000	SE
6	Koldanda	Mixed	< 1000	NW
7	Gahate Armana	Mixed	1000 - 1300	SW
8	Gahate Armana	Monospecific	> 1300	SE
9	Gahate Armana	Monospecific	1000 - 1300	SE
10	Thulo Pakho	Mixed	1000 - 1300	NE
11	Hariyali	Mixed	1000 - 1300	NW
12	Laligurans	Mixed	> 1300	NW
13	Nabha Pratibha	Monospecific	> 1300	NW
14	Bhumethan	Mixed	> 1300	SW
15	Bhumethan	Mixed	> 1300	NE
16	Jayashankar	Monospecific	> 1300	NE
17	Jayashankar	Monospecific	< 1000	NE
18	Shivashankar	Mixed	> 1300	SE
19	Koldanda	Mixed	< 1000	NE
20	Thulo Pakho	Mixed	1000 - 1300	SE
21	Jayashankar	Monospecific	< 1000	NW
22	Nabha Pratibha	Monospecific	1000 - 1300	NW
23	Shivashankar	Monospecific	1000 - 1300	SW
24	Shivashankar	Monospecific	> 1300	SW

## Sheet: Trees
Plot	Stand origin	Stand type	Altitude	Aspect	Tree_ID	Unique TreeID	Species	DBH (cm)	Height (m)	No. of tree/ha	BA_m2	Ln_Vol_dm3	Vol_dm3	Vol_m3	Vol_m3/ha	Density_kg/m3	Stem_B_kg/ha	Stem_B_t/ha	Branch_B_t/ha	Leaf_B_t/ha	AGB_t/ha	Stem_C_t/ha	Branch_C_t/ha	Leaf_C_t/ha	AGB_C_t/ha
1	Plantation	Mixed	< 1000	SW	1	1	Chirpine	28.2	14.5	20	0.062458	6.12542	457.335	0.457335	9.14669	650	5945.35	5.94535	1.52201	0.273486	7.74085	2.75389	0.704995	0.118857	3.57774
1	Plantation	Mixed	< 1000	SW	2	2	Chirpine	26.8	14.2	20	0.0564104	6.00652	406.069	0.406069	8.12139	650	5278.9	5.2789	0.997713	0.533169	6.80978	2.44519	0.46214	0.231715	3.13904
1	Plantation	Mixed	< 1000	SW	3	3	Chirpine	30.8	16.4	20	0.074506	6.41842	613.034	0.613034	12.2607	650	7969.44	7.96944	2.04018	0.366594	10.3762	3.69145	0.94501	0.159322	4.79578
1	Plantation	Mixed	< 1000	SW	4	4	Chirpine	26.2	14.2	20	0.0539129	5.96297	388.764	0.388764	7.77527	650	5053.93	5.05393	0.955192	0.510447	6.51956	2.34098	0.442445	0.22184	3.00526
1	Plantation	Mixed	< 1000	SW	5	5	Chirpine	27.6	13.8	20	0.0598285	6.03447	417.579	0.417579	8.35158	650	5428.53	5.42853	1.02599	0.548281	7.0028	2.51449	0.475239	0.238283	3.22802
1	Plantation	Mixed	< 1000	SW	6	6	Chirpine	23	13	20	0.0415476	5.62395	276.98	0.27698	5.5396	650	3600.74	3.60074	0.68054	0.363675	4.64496	1.66786	0.315226	0.158053	2.14114
1	Plantation	Mixed	< 1000	SW	7	7	Chirpine	22.9	14.5	20	0.0411871	5.72497	306.424	0.306424	6.12849	650	3983.52	3.98352	0.752885	0.402335	5.13874	1.84517	0.348736	0.174855	2.36876
1	Plantation	Mixed	< 1000	SW	8	8	Chirpine	21.7	12.2	20	0.0369836	5.4484	232.386	0.232386	4.64772	650	3021.02	3.02102	0.570972	0.305123	3.89711	1.39933	0.264474	0.132606	1.79641
1	Plantation	Mixed	< 1000	SW	9	9	Chirpine	24.5	14.2	20	0.0471435	5.83393	341.699	0.341699	6.83398	650	4442.09	4.44209	0.839555	0.448651	5.7303	2.05758	0.388882	0.194984	2.64144
1	Plantation	Mixed	< 1000	SW	10	10	Chirpine	17	9	20	0.022698	4.67409	107.135	0.107135	2.14269	650	1392.75	1.39275	0.263229	0.140668	1.79665	0.645121	0.121928	0.0611341	0.828183
1	Plantation	Mixed	< 1000	SW	11	11	Chirpine	23.5	10.4	20	0.0433736	5.44175	230.845	0.230845	4.6169	650	3000.98	3.00098	0.567186	0.303099	3.87127	1.39005	0.26272	0.131727	1.7845
1	Plantation	Mixed	< 1000	SW	12	12	Chirpine	24.7	13.8	20	0.0479164	5.82094	337.289	0.337289	6.74579	650	4384.76	4.38476	0.82872	0.442861	5.65634	2.03102	0.383863	0.192467	2.60735
1	Plantation	Mixed	< 1000	SW	13	13	Chirpine	27.1	14	20	0.0576804	6.01372	409.004	0.409004	8.18008	650	5317.05	5.31705	1.00492	0.537022	6.859	2.46286	0.46548	0.23339	3.16173
1	Plantation	Mixed	< 1000	SW	14	14	Chirpine	22	13.4	20	0.0380133	5.56881	262.121	0.262121	5.24242	650	3407.57	3.40757	0.644031	0.344165	4.39577	1.57839	0.298315	0.149574	2.02628
1	Plantation	Mixed	< 1000	SW	15	15	Chirpine	17.2	15	20	0.0232352	5.20838	182.797	0.182797	3.65595	650	2376.37	2.37637	0.449133	0.240013	3.06551	1.10073	0.208039	0.10431	1.41308
1	Plantation	Mixed	< 1000	SW	16	16	Chirpine	18.6	14.5	20	0.0271716	5.32493	205.394	0.205394	4.10788	650	2670.12	2.67012	0.504653	0.269683	3.44446	1.2368	0.233755	0.117204	1.58776
1	Plantation	Mixed	< 1000	SW	17	17	Chirpine	22.3	11	20	0.0390571	5.39712	220.771	0.220771	4.41541	650	2870.02	2.87002	0.542433	0.289872	3.70232	1.32939	0.251255	0.125978	1.70662
1	Plantation	Mixed	< 1000	SW	18	18	Chirpine	28.2	14.6	20	0.062458	6.1323	460.495	0.460495	9.20989	650	5986.43	5.98643	1.53253	0.275376	7.79433	2.77291	0.709866	0.119678	3.60246
1	Plantation	Mixed	< 1000	SW	19	19	Chilaune	10.3	10	20	0.00833229	3.81467	45.3618	0.0453618	0.907237	690	625.993	0.625993	0.325516	0.0400636	0.991573	0.28201	0.146645	0.0174357	0.446091
1	Plantation	Mixed	< 1000	SW	20	20	Chilaune	10	8.1	20	0.00785398	3.54877	34.7705	0.0347705	0.69541	690	479.833	0.479833	0.249513	0.0307093	0.760055	0.216165	0.112406	0.0133647	0.341935
1	Plantation	Mixed	< 1000	SW	21	21	Chilaune	8.8	9.6	20	0.00608212	3.48781	32.7142	0.0327142	0.654284	690	451.456	0.451456	0.234757	0.0288932	0.715106	0.203381	0.105758	0.0125743	0.321713
2	Plantation	Monospecific	< 1000	SE	1	22	Chirpine	30.5	22	20	0.0730617	6.69391	807.475	0.807475	16.1495	650	10497.2	10.4972	1.98397	1.06022	13.5414	4.86229	0.918974	0.46077	6.24204
2	Plantation	Monospecific	< 1000	SE	2	23	Chirpine	17	15.1	20	0.022698	5.19254	179.925	0.179925	3.59849	650	2339.02	2.33902	0.442075	0.236241	3.01734	1.08343	0.204769	0.10267	1.39087
2	Plantation	Monospecific	< 1000	SE	3	24	Chirpine	32.5	22.2	20	0.0829577	6.82515	920.712	0.920712	18.4142	650	11969.3	11.9693	2.26219	1.2089	15.4403	5.54416	1.04785	0.525386	7.11739
2	Plantation	Monospecific	< 1000	SE	4	25	Chirpine	25	16.8	20	0.0490874	6.04125	420.417	0.420417	8.40834	650	5465.42	5.46542	1.39915	0.251409	7.11598	2.53158	0.648085	0.109263	3.28893
2	Plantation	Monospecific	< 1000	SE	5	26	Chirpine	19.2	12	20	0.0289529	5.1964	180.62	0.18062	3.61241	650	2348.07	2.34807	0.601105	0.108011	3.05718	1.08762	0.278432	0.0469416	1.413
2	Plantation	Monospecific	< 1000	SE	6	27	Chirpine	33.2	22.2	20	0.0865697	6.86614	959.236	0.959236	19.1847	650	12470.1	12.4701	3.19234	0.573623	16.236	5.77614	1.47869	0.249297	7.50412
2	Plantation	Monospecific	< 1000	SE	7	28	Chirpine	17.5	13.3	20	0.0240528	5.12112	167.524	0.167524	3.35047	650	2177.81	2.17781	0.557519	0.100179	2.8355	1.00876	0.258243	0.0435378	1.31054
2	Plantation	Monospecific	< 1000	SE	8	29	Chirpine	21.7	19	20	0.0369836	5.89224	362.217	0.362217	7.24434	650	4708.82	4.70882	1.20546	0.216606	6.13089	2.18113	0.558368	0.0941369	2.83363
2	Plantation	Monospecific	< 1000	SE	9	30	Chirpine	22.2	19.9	20	0.0387076	5.98243	396.402	0.396402	7.92805	650	5153.23	5.15323	1.31923	0.237049	6.70951	2.38698	0.611066	0.103021	3.10106
2	Plantation	Monospecific	< 1000	SE	10	31	Chirpine	24.8	20.7	20	0.0483051	6.23495	510.274	0.510274	10.2055	650	6633.57	6.63357	1.69819	0.305144	8.63691	3.07267	0.786603	0.132616	3.99189
2	Plantation	Monospecific	< 1000	SE	11	32	Chirpine	33	22.1	20	0.0855299	6.84999	943.873	0.943873	18.8775	650	12270.3	12.2703	3.14121	0.564436	15.976	5.68362	1.45501	0.245304	7.38394
2	Plantation	Monospecific	< 1000	SE	12	33	Chirpine	32.5	22.4	20	0.0829577	6.83413	929.023	0.929023	18.5805	650	12077.3	12.0773	2.28261	1.21981	15.5797	5.5942	1.0573	0.530128	7.18164
2	Plantation	Monospecific	< 1000	SE	13	34	Chirpine	26.8	21.3	20	0.0564104	6.41276	609.574	0.609574	12.1915	650	7924.46	7.92446	1.49772	0.80037	10.2225	3.67061	0.693745	0.347841	4.71219
2	Plantation	Monospecific	< 1000	SE	14	35	Chirpine	25	21	20	0.0490874	6.26481	525.744	0.525744	10.5149	650	6834.67	6.83467	1.74968	0.314395	8.89875	3.16582	0.81045	0.136636	4.11291
2	Plantation	Monospecific	< 1000	SE	15	36	Chirpine	25.1	20.2	20	0.0494809	6.23358	509.576	0.509576	10.1915	650	6624.49	6.62449	1.25203	0.669074	8.5456	3.06846	0.57994	0.290779	3.93918
2	Plantation	Monospecific	< 1000	SE	16	37	Chirpine	17.5	16.1	20	0.0240528	5.31254	202.865	0.202865	4.05731	650	2637.25	2.63725	0.49844	0.266362	3.40205	1.22157	0.230877	0.115761	1.56821
2	Plantation	Monospecific	< 1000	SE	17	38	Chirpine	20.7	13.9	20	0.0336535	5.48835	241.858	0.241858	4.83716	650	3144.16	3.14416	0.594246	0.31756	4.05596	1.45637	0.275255	0.138011	1.86964
2	Plantation	Monospecific	< 1000	SE	18	39	Chirpine	10.8	13	20	0.00916088	4.16988	64.7077	0.0647077	1.29415	650	841.2	0.8412	0.158987	0.0849612	1.08515	0.389644	0.0736427	0.0369241	0.50021
2	Plantation	Monospecific	< 1000	SE	19	40	Chirpine	28.8	19.9	20	0.0651441	6.48308	653.985	0.653985	13.0797	650	8501.8	8.5018	1.60684	0.858682	10.9673	3.93804	0.744289	0.373183	5.05551
2	Plantation	Monospecific	< 1000	SE	20	41	Chirpine	26.7	19	20	0.0559902	6.29108	539.738	0.539738	10.7948	650	7016.59	7.01659	1.32614	0.708676	9.05141	3.25009	0.614266	0.307991	4.17234
2	Plantation	Monospecific	< 1000	SE	21	42	Chirpine	25.2	18.4	20	0.0498759	6.14772	467.649	0.467649	9.35299	650	6079.44	6.07944	1.14901	0.614023	7.84248	2.816	0.532223	0.266855	3.61507
2	Plantation	Monospecific	< 1000	SE	22	43	Chirpine	20.6	18	20	0.0333292	5.73801	310.446	0.310446	6.20893	650	4035.8	4.0358	0.762766	0.407616	5.20618	1.86938	0.353313	0.17715	2.39985
2	Plantation	Monospecific	< 1000	SE	23	44	Chirpine	28.5	20	20	0.063794	6.46796	644.171	0.644171	12.8834	650	8374.23	8.37423	1.58273	0.845797	10.8028	3.87894	0.73312	0.367583	4.97965
2	Plantation	Monospecific	< 1000	SE	24	45	Chirpine	26.2	20.1	20	0.0539129	6.31111	550.656	0.550656	11.0131	650	7158.52	7.15852	1.35296	0.723011	9.23449	3.31583	0.626691	0.31422	4.25674
2	Plantation	Monospecific	< 1000	SE	25	46	Chirpine	10.5	11.4	20	0.00865901	3.98411	53.7373	0.0537373	1.07475	650	698.585	0.698585	0.132033	0.0705571	0.901175	0.323585	0.0611575	0.0306641	0.415406
2	Plantation	Monospecific	< 1000	SE	26	47	Chirpine	32	22.3	20	0.0804248	6.79983	897.693	0.897693	17.9539	650	11670	11.67	2.20563	1.17867	15.0543	5.40555	1.02165	0.512251	6.93945
3	Plantation	Monospecific	1000 - 1300	NE	1	48	Chirpine	18	17.1	20	0.0254469	5.4271	227.489	0.227489	4.54978	650	2957.36	2.95736	0.558941	0.298693	3.81499	1.36985	0.258901	0.129812	1.75856
3	Plantation	Monospecific	1000 - 1300	NE	2	49	Chirpine	19.1	17.8	20	0.0286521	5.58139	265.441	0.265441	5.30883	650	3450.74	3.45074	0.65219	0.348525	4.45145	1.59838	0.302094	0.151469	2.05195
3	Plantation	Monospecific	1000 - 1300	NE	3	50	Chirpine	36.2	26.1	20	0.102922	7.19469	1332.33	1.33233	26.6467	650	17320.4	17.3204	4.43401	0.796736	22.5511	8.02279	2.05383	0.346262	10.4229
3	Plantation	Monospecific	1000 - 1300	NE	4	51	Chirpine	26.8	21.2	20	0.0564104	6.40804	606.706	0.606706	12.1341	650	7887.18	7.88718	2.01912	0.36281	10.2691	3.65334	0.935256	0.157677	4.74628
3	Plantation	Monospecific	1000 - 1300	NE	5	52	Chirpine	33.8	22.5	20	0.089727	6.91404	1006.3	1.0063	20.126	650	13081.9	13.0819	3.34897	0.601768	17.0327	6.05955	1.55124	0.261529	7.87232
3	Plantation	Monospecific	1000 - 1300	NE	6	53	Chirpine	29.5	23	20	0.0683493	6.67433	791.814	0.791814	15.8363	650	10293.6	10.2936	2.63516	0.473505	13.4022	4.76799	1.2206	0.205785	6.19438
3	Plantation	Monospecific	1000 - 1300	NE	7	54	Chirpine	25	23.1	20	0.0490874	6.36031	578.423	0.578423	11.5685	650	7519.5	7.5195	1.92499	0.345897	9.79039	3.48303	0.891657	0.150327	4.52502
3	Plantation	Monospecific	1000 - 1300	NE	8	55	Chirpine	32	25	20	0.0804248	6.91433	1006.6	1.0066	20.132	650	13085.8	13.0858	3.34997	0.601947	17.0377	6.06135	1.55171	0.261606	7.87466
3	Plantation	Monospecific	1000 - 1300	NE	9	56	Chirpine	34.3	24	20	0.0924013	7.00694	1104.27	1.10427	22.0855	650	14355.6	14.3556	3.67503	0.660356	18.691	6.6495	1.70227	0.286991	8.63877
3	Plantation	Monospecific	1000 - 1300	NE	10	57	Chirpine	21.3	20.8	20	0.0356327	5.94714	382.658	0.382658	7.65317	650	4974.56	4.97456	1.27349	0.22883	6.47687	2.30422	0.589879	0.0994494	2.99354
3	Plantation	Monospecific	1000 - 1300	NE	11	58	Chirpine	25.6	22.5	20	0.0514719	6.37956	589.667	0.589667	11.7933	650	7665.67	7.66567	1.96241	0.352621	9.9807	3.55074	0.908989	0.153249	4.61297
3	Plantation	Monospecific	1000 - 1300	NE	12	59	Chirpine	24	22.5	20	0.0452389	6.25542	520.827	0.520827	10.4165	650	6770.75	6.77075	1.73331	0.311454	8.81551	3.13621	0.80287	0.135358	4.07444
3	Plantation	Monospecific	1000 - 1300	NE	13	60	Chirpine	39.6	24.7	20	0.123163	7.31212	1498.36	1.49836	29.9671	650	19478.6	19.4786	3.68146	1.96734	25.1274	9.0225	1.70525	0.855007	11.5828
3	Plantation	Monospecific	1000 - 1300	NE	14	61	Chirpine	30.2	23	20	0.0716315	6.71944	828.35	0.82835	16.567	650	10768.5	10.7685	2.03526	1.08762	13.8914	4.98799	0.94273	0.472681	6.4034
3	Plantation	Monospecific	1000 - 1300	NE	15	62	Chirpine	39	26.1	20	0.119459	7.33799	1537.62	1.53762	30.7525	650	19989.1	19.9891	3.77794	2.0189	25.786	9.25896	1.74994	0.877414	11.8863
3	Plantation	Monospecific	1000 - 1300	NE	16	63	Chirpine	28.7	24.1	20	0.0646925	6.66825	787.017	0.787017	15.7403	650	10231.2	10.2312	1.9337	1.03335	13.1983	4.7391	0.89569	0.449095	6.08389
3	Plantation	Monospecific	1000 - 1300	NE	17	64	Chirpine	29.2	24	20	0.0669662	6.69731	810.22	0.81022	16.2044	650	10532.9	10.5329	1.99071	1.06382	13.5874	4.87882	0.922097	0.462336	6.26325
3	Plantation	Monospecific	1000 - 1300	NE	18	65	Chirpine	23	22.3	20	0.0415476	6.16461	475.615	0.475615	9.5123	650	6182.99	6.18299	1.16859	0.624482	7.97606	2.86396	0.541289	0.2714	3.67665
3	Plantation	Monospecific	1000 - 1300	NE	19	66	Chirpine	20.7	22.5	20	0.0336535	5.97089	391.856	0.391856	7.83711	650	5094.12	5.09412	0.962789	0.514506	6.57142	2.3596	0.445964	0.223604	3.02917
3	Plantation	Monospecific	1000 - 1300	NE	20	67	Chirpine	21	22	20	0.0346361	5.97605	393.883	0.393883	7.87766	650	5120.48	5.12048	0.967771	0.517169	6.60542	2.37181	0.448272	0.224761	3.04484
3	Plantation	Monospecific	1000 - 1300	NE	21	68	Chirpine	24.7	23.3	20	0.0479164	6.34572	570.049	0.570049	11.401	650	7410.63	7.41063	1.40061	0.748474	9.55971	3.4326	0.648762	0.325287	4.40665
3	Plantation	Monospecific	1000 - 1300	NE	22	69	Chirpine	27.9	24.1	20	0.0611362	6.61387	745.363	0.745363	14.9073	650	9689.72	9.68972	1.83136	0.978662	12.4997	4.48828	0.848285	0.425326	5.76189
4	Plantation	Monospecific	< 1000	SW	1	70	Chirpine	30.8	21	20	0.074506	6.66613	785.352	0.785352	15.707	650	10209.6	10.2096	1.92961	1.03117	13.1703	4.72907	0.893795	0.448145	6.07101
4	Plantation	Monospecific	< 1000	SW	2	71	Chirpine	22.6	16.5	20	0.040115	5.82906	340.04	0.34004	6.8008	650	4420.52	4.42052	0.835478	0.446473	5.70247	2.04759	0.386994	0.194037	2.62862
4	Plantation	Monospecific	< 1000	SW	3	72	Chirpine	29.6	22.5	20	0.0688134	6.65881	779.627	0.779627	15.5925	650	10135.1	10.1351	1.91554	1.02365	13.0743	4.6946	0.887279	0.444878	6.02676
4	Plantation	Monospecific	< 1000	SW	4	73	Chirpine	27.9	21.5	20	0.0611362	6.4995	664.806	0.664806	13.2961	650	8642.48	8.64248	1.63343	0.872891	11.1488	4.0032	0.756604	0.379358	5.13916
4	Plantation	Monospecific	< 1000	SW	5	74	Chirpine	26	16.2	20	0.0530929	6.08025	437.139	0.437139	8.74278	650	5682.81	5.68281	1.07405	0.573964	7.33082	2.63228	0.4975	0.249445	3.37922
4	Plantation	Monospecific	< 1000	SW	6	75	Chirpine	24.1	19.5	20	0.0456167	6.12004	454.884	0.454884	9.09768	650	5913.49	5.91349	1.11765	0.597263	7.62841	2.73913	0.517696	0.25957	3.5164
4	Plantation	Monospecific	< 1000	SW	7	76	Chirpine	17.1	14	20	0.0229658	5.12804	168.686	0.168686	3.37372	650	2192.92	2.19292	0.414461	0.221485	2.82886	1.01576	0.191979	0.0962573	1.304
4	Plantation	Monospecific	< 1000	SW	8	77	Chirpine	27.4	22	20	0.0589646	6.48774	657.04	0.65704	13.1408	650	8541.52	8.54152	1.61435	0.862694	11.0186	3.95643	0.747766	0.374927	5.07912
4	Plantation	Monospecific	< 1000	SW	9	78	Chirpine	26.9	24.1	20	0.0568322	6.54366	694.827	0.694827	13.8965	650	9032.75	9.03275	1.70719	0.912308	11.6522	4.18397	0.79077	0.396489	5.37123
4	Plantation	Monospecific	< 1000	SW	10	79	Chirpine	35.9	24.3	20	0.101223	7.10709	1220.59	1.22059	24.4117	650	15867.6	15.8676	2.99898	1.60263	20.4692	7.34988	1.38913	0.696503	9.43551
4	Plantation	Monospecific	< 1000	SW	11	80	Chirpine	20	12.5	20	0.0314159	5.31582	203.531	0.203531	4.07062	650	2645.9	2.6459	0.500076	0.267236	3.41322	1.22558	0.231635	0.116141	1.57336
4	Plantation	Monospecific	< 1000	SW	12	81	Chirpine	17.6	13	20	0.0243285	5.10923	165.542	0.165542	3.31084	650	2152.05	2.15205	0.406737	0.217357	2.77614	0.996829	0.188401	0.0944633	1.27969
4	Plantation	Monospecific	< 1000	SW	13	82	Chirpine	28.1	18	20	0.0620158	6.33522	564.091	0.564091	11.2818	650	7333.19	7.33319	1.38597	0.740652	9.45981	3.39673	0.641982	0.321887	4.3606
4	Plantation	Monospecific	< 1000	SW	14	83	Chirpine	30	18	20	0.0706858	6.46107	639.743	0.639743	12.7949	650	8316.66	8.31666	1.57185	0.839983	10.7285	3.85228	0.72808	0.365056	4.94541
5	Plantation	Mixed	< 1000	SE	1	84	Chirpine	39.8	24.1	20	0.12441	7.29718	1476.13	1.47613	29.5225	650	19189.6	19.1896	3.62684	1.93815	24.7546	8.88864	1.67995	0.842321	11.4109
5	Plantation	Mixed	< 1000	SE	2	85	Chirpine	25.5	22.3	20	0.0510705	6.36308	580.032	0.580032	11.6006	650	7540.42	7.54042	1.42514	0.761582	9.72714	3.49272	0.660124	0.330984	4.48383
5	Plantation	Mixed	< 1000	SE	3	86	Chirpine	18.6	21.2	20	0.0271716	5.70551	300.517	0.300517	6.01034	650	3906.72	3.90672	0.738371	0.394579	5.03967	1.80959	0.342013	0.171484	2.32309
5	Plantation	Mixed	< 1000	SE	4	87	Chirpine	25.5	22.3	20	0.0510705	6.36308	580.032	0.580032	11.6006	650	7540.42	7.54042	1.42514	0.761582	9.72714	3.49272	0.660124	0.330984	4.48383
5	Plantation	Mixed	< 1000	SE	5	88	Chirpine	23.9	23.5	20	0.0448627	6.29095	539.668	0.539668	10.7934	650	7015.68	7.01568	1.32596	0.708584	9.05023	3.24966	0.614187	0.307951	4.1718
5	Plantation	Mixed	< 1000	SE	6	89	Chirpine	19	22	20	0.0283529	5.78354	324.909	0.324909	6.49817	650	4223.81	4.22381	0.7983	0.426605	5.44872	1.95647	0.369773	0.185403	2.51164
5	Plantation	Mixed	< 1000	SE	7	90	Chirpine	17.8	20.8	20	0.0248846	5.60186	270.929	0.270929	5.41858	650	3522.08	3.52208	0.901652	0.162016	4.58575	1.63143	0.417645	0.070412	2.11948
5	Plantation	Mixed	< 1000	SE	8	91	Chirpine	16.8	21	20	0.0221671	5.50023	244.748	0.244748	4.89496	650	3181.72	3.18172	0.601346	0.321354	4.10442	1.47377	0.278543	0.139661	1.89198
5	Plantation	Mixed	< 1000	SE	9	92	Chirpine	26.5	23.2	20	0.0551546	6.47671	649.832	0.649832	12.9966	650	8447.82	8.44782	1.59664	0.85323	10.8977	3.91303	0.739563	0.370814	5.02341
5	Plantation	Mixed	< 1000	SE	10	93	Chirpine	24.7	22.9	20	0.0479164	6.32837	560.244	0.560244	11.2049	650	7283.17	7.28317	1.86449	0.335026	9.48269	3.37356	0.863632	0.145602	4.3828
5	Plantation	Mixed	< 1000	SE	11	94	Chirpine	19.7	21.1	20	0.0304805	5.81129	334.049	0.334049	6.68097	650	4342.63	4.34263	0.820758	0.438606	5.602	2.01151	0.380175	0.190618	2.5823
5	Plantation	Mixed	< 1000	SE	12	95	Chirpine	26.2	23.1	20	0.0539129	6.45049	633.01	0.63301	12.6602	650	8229.13	8.22913	1.55531	0.831142	10.6156	3.81173	0.720418	0.361214	4.89337
5	Plantation	Mixed	< 1000	SE	13	96	Chilaune	13.1	9.9	20	0.0134782	4.24112	69.4855	0.0694855	1.38971	690	958.9	0.9589	0.245478	0.0441094	1.24849	0.431985	0.110588	0.0191964	0.561769
5	Plantation	Mixed	< 1000	SE	14	97	Chilaune	7.5	8.1	20	0.00441786	3.02648	20.6245	0.0206245	0.412491	690	284.619	0.284619	0.0537929	0.0287465	0.367158	0.128221	0.0242337	0.0125105	0.164965
5	Plantation	Mixed	< 1000	SE	15	98	Chilaune	11.5	8.5	20	0.0103869	3.85106	47.0427	0.0470427	0.940854	690	649.189	0.649189	0.122697	0.0655681	0.837454	0.29246	0.0552749	0.0285352	0.37627
5	Plantation	Mixed	< 1000	SE	16	99	Chilaune	23.8	21	20	0.0444881	6.08251	438.126	0.438126	8.76253	690	6046.14	6.04614	1.14272	0.61066	7.79952	2.72379	0.514796	0.265759	3.50434
5	Plantation	Mixed	< 1000	SE	17	100	Chilaune	29	24	20	0.066052	6.57576	717.492	0.717492	14.3498	690	9901.39	9.90139	1.87136	1.00004	12.7728	4.46057	0.843049	0.435217	5.73884
5	Plantation	Mixed	< 1000	SE	18	101	Chilaune	19.5	21.1	20	0.0298648	5.72552	306.591	0.306591	6.13182	690	4230.96	4.23096	1.08313	0.194624	5.50871	1.90605	0.487948	0.0847004	2.4787
6	Plantation	Mixed	< 1000	NW	1	102	Chirpine	28.8	22.5	20	0.0651441	6.60611	739.603	0.739603	14.7921	650	9614.83	9.61483	1.8172	0.971098	12.4031	4.45359	0.841729	0.422039	5.71736
6	Plantation	Mixed	< 1000	NW	2	103	Chirpine	30.1	25.1	20	0.0711579	6.8006	898.382	0.898382	17.9676	650	11679	11.679	2.20732	1.17958	15.0659	5.4097	1.02243	0.512644	6.94477
6	Plantation	Mixed	< 1000	NW	3	104	Chirpine	29.8	24.2	20	0.0697465	6.74474	849.581	0.849581	16.9916	650	11044.6	11.0446	2.08742	1.1155	14.2475	5.11584	0.966893	0.484796	6.56753
6	Plantation	Mixed	< 1000	NW	4	105	Chirpine	32.2	24.1	20	0.0814332	6.88959	981.994	0.981994	19.6399	650	12765.9	12.7659	2.41276	1.28936	16.468	5.91318	1.11759	0.560355	7.59112
6	Plantation	Mixed	< 1000	NW	5	106	Chirpine	16	19.2	20	0.0201062	5.3166	203.69	0.20369	4.0738	650	2647.97	2.64797	0.500466	0.267445	3.41588	1.22654	0.231816	0.116232	1.57459
6	Plantation	Mixed	< 1000	NW	6	107	Chirpine	17	18.9	20	0.022698	5.41743	225.3	0.2253	4.506	650	2928.9	2.9289	0.553562	0.295819	3.77828	1.35667	0.25641	0.128563	1.74164
6	Plantation	Mixed	< 1000	NW	7	108	Chirpine	12	15.3	20	0.0113097	4.53575	93.2938	0.0932938	1.86588	650	1212.82	1.21282	0.229223	0.122495	1.56454	0.561778	0.106176	0.0532362	0.72119
6	Plantation	Mixed	< 1000	NW	8	109	Chirpine	31	23.9	20	0.0754768	6.80818	905.225	0.905225	18.1045	650	11767.9	11.7679	2.22414	1.18856	15.1806	5.4509	1.03022	0.516548	6.99767
6	Plantation	Mixed	< 1000	NW	9	110	Chirpine	31.5	24	20	0.0779311	6.84314	937.431	0.937431	18.7486	650	12186.6	12.1866	2.30327	1.23085	15.7207	5.64483	1.06687	0.534926	7.24663
6	Plantation	Mixed	< 1000	NW	10	111	Chirpine	18.3	20.4	20	0.0263022	5.63569	280.252	0.280252	5.60504	650	3643.27	3.64327	0.688579	0.367971	4.69982	1.68756	0.31895	0.15992	2.16643
6	Plantation	Mixed	< 1000	NW	11	112	Chirpine	29	26.5	20	0.066052	6.78336	883.035	0.883035	17.6607	650	11479.5	11.4795	2.16962	1.15942	14.8085	5.31728	1.00497	0.503886	6.82614
6	Plantation	Mixed	< 1000	NW	12	113	Chirpine	33	24	20	0.0855299	6.93262	1025.18	1.02518	20.5036	650	13327.4	13.3274	3.4118	0.613058	17.3522	6.17323	1.58035	0.266435	8.02001
6	Plantation	Mixed	< 1000	NW	13	114	Chirpine	33.7	23.8	20	0.0891969	6.96462	1058.51	1.05851	21.1701	650	13760.6	13.7606	3.52271	0.632987	17.9163	6.37391	1.63172	0.275096	8.28072
6	Plantation	Mixed	< 1000	NW	14	115	Chilaune	22.1	16.3	20	0.0383596	5.69278	296.718	0.296718	5.93436	690	4094.71	4.09471	1.04825	0.188357	5.33131	1.84467	0.472235	0.0819728	2.39887
6	Plantation	Mixed	< 1000	NW	15	116	Chilaune	21.2	15.9	20	0.0352989	5.59228	268.346	0.268346	5.36691	690	3703.17	3.70317	0.948011	0.170346	4.82153	1.66828	0.427079	0.0741345	2.16949
6	Plantation	Mixed	< 1000	NW	16	117	Chilaune	21.5	14	20	0.036305	5.48961	242.162	0.242162	4.84325	690	3341.84	3.34184	0.855511	0.153725	4.35108	1.5055	0.385408	0.066901	1.95781
6	Plantation	Mixed	< 1000	NW	17	118	Chilaune	29.9	14.5	20	0.0702154	6.12371	456.557	0.456557	9.13115	690	6300.49	6.30049	1.19079	0.63635	8.12764	2.83837	0.536452	0.276939	3.65176
6	Plantation	Mixed	< 1000	NW	18	119	Chilaune	5.2	13	20	0.00212372	2.83806	17.0825	0.0170825	0.341651	690	235.739	0.235739	0.0445547	0.0238096	0.304103	0.1062	0.0200719	0.010362	0.136634
6	Plantation	Mixed	< 1000	NW	19	120	Chilaune	32.9	14.1	20	0.0850123	6.26913	528.016	0.528016	10.5603	690	7286.62	7.28662	1.37717	0.735949	9.39974	3.28262	0.620416	0.320285	4.22332
6	Plantation	Mixed	< 1000	NW	20	121	Chilaune	15.1	13.5	20	0.0179079	4.81146	122.911	0.122911	2.45821	690	1696.17	1.69617	0.320575	0.171313	2.18805	0.764123	0.144419	0.0745553	0.983098
6	Plantation	Mixed	< 1000	NW	21	122	Chilaune	16.4	12.1	20	0.0211241	4.85112	127.884	0.127884	2.55767	690	1764.79	1.76479	0.333546	0.178244	2.27658	0.79504	0.150263	0.0775719	1.02287
6	Plantation	Mixed	< 1000	NW	22	123	Chilaune	18	20.1	20	0.0254469	5.53129	252.471	0.252471	5.04941	690	3484.09	3.48409	0.658494	0.351894	4.49448	1.56958	0.296652	0.153144	2.01938
6	Plantation	Mixed	< 1000	NW	23	124	Chilaune	18.3	12.8	20	0.0263022	5.10678	165.138	0.165138	3.30276	690	2278.9	2.2789	0.430712	0.230169	2.93978	1.02664	0.194036	0.10017	1.32085
7	Plantation	Mixed	1000 - 1300	SW	1	125	Chirpine	29.5	22	20	0.0683493	6.62979	757.323	0.757323	15.1465	650	9845.2	9.8452	2.52037	0.452879	12.8185	4.5603	1.16744	0.196821	5.92455
7	Plantation	Mixed	1000 - 1300	SW	2	126	Chirpine	39.5	25	20	0.122542	7.31936	1509.23	1.50923	30.1846	650	19620	19.62	5.02272	0.902521	25.5453	9.08799	2.32653	0.392235	11.8068
7	Plantation	Mixed	1000 - 1300	SW	3	127	Chirpine	34.8	24.9	20	0.0951149	7.07167	1178.11	1.17811	23.5622	650	15315.4	15.3154	3.92074	0.704509	19.9407	7.0941	1.81609	0.306179	9.21636
7	Plantation	Mixed	1000 - 1300	SW	4	128	Chirpine	23.2	21.6	20	0.0422733	6.14931	468.393	0.468393	9.36787	650	6089.11	6.08911	1.55881	0.280099	7.92803	2.82048	0.722042	0.121731	3.66425
7	Plantation	Mixed	1000 - 1300	SW	5	129	Chirpine	28.7	22	20	0.0646925	6.57691	718.314	0.718314	14.3663	650	9338.08	9.33808	2.39055	0.429552	12.1582	4.3254	1.1073	0.186683	5.61939
7	Plantation	Mixed	1000 - 1300	SW	6	130	Chirpine	22	21.1	20	0.0380133	6.02369	413.099	0.413099	8.26198	650	5370.28	5.37028	1.37479	0.247033	6.99211	2.48752	0.636804	0.107361	3.23168
7	Plantation	Mixed	1000 - 1300	SW	7	131	Chirpine	35.2	23.2	20	0.097314	7.0228	1121.92	1.12192	22.4384	650	14585	14.585	3.73376	0.670909	18.9896	6.75576	1.72948	0.291577	8.77682
7	Plantation	Mixed	1000 - 1300	SW	8	132	Chirpine	27.9	21.4	20	0.0611362	6.49482	661.708	0.661708	13.2342	650	8602.21	8.60221	1.62582	0.868823	11.0968	3.98454	0.753079	0.37759	5.11521
7	Plantation	Mixed	1000 - 1300	SW	9	133	Chilaune	9.5	9	20	0.00708822	3.56176	35.2253	0.0352253	0.704506	690	486.109	0.486109	0.0918747	0.049097	0.627081	0.218992	0.0413895	0.021367	0.281749
8	Plantation	Monospecific	> 1300	SE	1	134	Chirpine	27.8	22.5	20	0.0606987	6.53814	690.999	0.690999	13.82	650	8982.98	8.98298	2.29964	0.413217	11.6958	4.16092	1.06519	0.179584	5.4057
8	Plantation	Monospecific	> 1300	SE	2	135	Chirpine	34	25.1	20	0.090792	7.03495	1135.63	1.13563	22.7127	650	14763.2	14.7632	2.79025	1.49109	19.0446	6.83833	1.29244	0.648026	8.7788
8	Plantation	Monospecific	> 1300	SE	3	136	Chirpine	33.3	24.8	20	0.087092	6.98288	1078.02	1.07802	21.5605	650	14014.3	14.0143	2.6487	1.41544	18.0784	6.49142	1.22688	0.615152	8.33345
8	Plantation	Monospecific	> 1300	SE	4	137	Chirpine	40.6	25.6	20	0.129462	7.39595	1629.37	1.62937	32.5875	650	21181.9	21.1819	5.42256	0.974366	27.5788	9.81144	2.51173	0.423459	12.7466
8	Plantation	Monospecific	> 1300	SE	5	138	Chirpine	36.8	25.3	20	0.106362	7.19512	1332.91	1.33291	26.6582	650	17327.8	17.3278	4.43592	0.797079	22.5608	8.02624	2.05472	0.34641	10.4274
8	Plantation	Monospecific	> 1300	SE	6	139	Chirpine	35.5	24.3	20	0.0989798	7.08553	1194.56	1.19456	23.8912	650	15529.3	15.5293	2.93504	1.56846	20.0328	7.19317	1.35951	0.681652	9.23433
8	Plantation	Monospecific	> 1300	SE	7	140	Chirpine	30.5	24.8	20	0.0730617	6.81394	910.452	0.910452	18.209	650	11835.9	11.8359	2.23698	1.19542	15.2683	5.48238	1.03617	0.519531	7.03808
8	Plantation	Monospecific	> 1300	SE	8	141	Chirpine	33.2	25.2	20	0.0865697	6.99313	1089.12	1.08912	21.7825	650	14158.6	14.1586	2.67598	1.43002	18.2646	6.55827	1.23951	0.621487	8.41927
8	Plantation	Monospecific	> 1300	SE	9	142	Chirpine	29.8	25.2	20	0.0697465	6.78531	884.756	0.884756	17.6951	650	11501.8	11.5018	2.17385	1.16168	14.8374	5.32765	1.00693	0.504868	6.83944
8	Plantation	Monospecific	> 1300	SE	10	143	Chirpine	27.5	21.5	20	0.0593957	6.47172	646.594	0.646594	12.9319	650	8405.73	8.40573	1.58868	0.848978	10.8434	3.89353	0.735878	0.368966	4.99838
9	Plantation	Monospecific	1000 - 1300	SE	1	144	Chirpine	32.3	23.6	20	0.0819398	6.87454	967.335	0.967335	19.3467	650	12575.4	12.5754	2.37674	1.27011	16.2222	5.8249	1.10091	0.55199	7.4778
9	Plantation	Monospecific	1000 - 1300	SE	2	145	Chirpine	35	24.2	20	0.0962113	7.05412	1157.62	1.15762	23.1523	650	15049	15.049	2.84426	1.51995	19.4132	6.97071	1.31746	0.660571	8.94874
9	Plantation	Monospecific	1000 - 1300	SE	3	146	Chirpine	31	23	20	0.0754768	6.76973	871.073	0.871073	17.4215	650	11324	11.324	2.14023	1.14372	14.6079	5.24525	0.991353	0.49706	6.73367
9	Plantation	Monospecific	1000 - 1300	SE	4	147	Chirpine	25.8	22	20	0.0522792	6.37201	585.233	0.585233	11.7047	650	7608.03	7.60803	1.94766	0.34997	9.90566	3.52404	0.902155	0.152097	4.57829
9	Plantation	Monospecific	1000 - 1300	SE	5	148	Chirpine	27.8	22.5	20	0.0606987	6.53814	690.999	0.690999	13.82	650	8982.98	8.98298	1.69778	0.907281	11.588	4.16092	0.786413	0.394304	5.34163
9	Plantation	Monospecific	1000 - 1300	SE	6	149	Chirpine	25	22.1	20	0.0490874	6.31597	553.337	0.553337	11.0667	650	7193.38	7.19338	1.8415	0.330895	9.36578	3.33197	0.852985	0.143807	4.32877
9	Plantation	Monospecific	1000 - 1300	SE	7	150	Chirpine	30	23.3	20	0.0706858	6.71964	828.518	0.828518	16.5704	650	10770.7	10.7707	2.03567	1.08784	13.8942	4.989	0.942922	0.472777	6.4047
9	Plantation	Monospecific	1000 - 1300	SE	8	151	Chirpine	33	23	20	0.0855299	6.88998	982.386	0.982386	19.6477	650	12771	12.771	2.41372	1.28987	16.4746	5.91553	1.11804	0.560579	7.59415
9	Plantation	Monospecific	1000 - 1300	SE	9	152	Chirpine	28.3	21.2	20	0.0629018	6.5128	673.709	0.673709	13.4742	650	8758.22	8.75822	1.6553	0.88458	11.2981	4.05681	0.766737	0.384439	5.20798
9	Plantation	Monospecific	1000 - 1300	SE	10	153	Chirpine	27.3	21.2	20	0.0585349	6.4436	628.666	0.628666	12.5733	650	8172.66	8.17266	1.54463	0.825439	10.5427	3.78558	0.715474	0.358736	4.85979
9	Plantation	Monospecific	1000 - 1300	SE	11	154	Chirpine	29.5	20.5	20	0.0683493	6.55904	705.593	0.705593	14.1119	650	9172.71	9.17271	2.34821	0.421945	11.9429	4.2488	1.08769	0.183377	5.51987
9	Plantation	Monospecific	1000 - 1300	SE	12	155	Chirpine	30.5	24	20	0.0730617	6.78109	881.028	0.881028	17.6206	650	11453.4	11.4534	2.16469	1.15679	14.7748	5.3052	1.00268	0.502741	6.81062
9	Plantation	Monospecific	1000 - 1300	SE	13	156	Chirpine	31.8	23.9	20	0.0794226	6.85719	950.694	0.950694	19.0139	650	12359	12.359	3.16391	0.568515	16.0914	5.7247	1.46552	0.247077	7.4373
9	Plantation	Monospecific	1000 - 1300	SE	14	157	Chirpine	23.5	21.1	20	0.0433736	6.15056	468.979	0.468979	9.37957	650	6096.72	6.09672	1.15228	0.615769	7.86477	2.824	0.533736	0.267613	3.62535
9	Plantation	Monospecific	1000 - 1300	SE	15	158	Chirpine	27	22	20	0.0572555	6.45946	638.715	0.638715	12.7743	650	8303.29	8.30329	1.56932	0.838632	10.7112	3.84608	0.72691	0.36447	4.93746
9	Plantation	Monospecific	1000 - 1300	SE	16	159	Chirpine	27.5	21.8	20	0.0593957	6.4856	655.634	0.655634	13.1127	650	8523.24	8.52324	2.18195	0.392069	11.0973	3.94796	1.01068	0.170393	5.12904
10	Native	Mixed	1000 - 1300	NE	1	160	Chirpine	6.5	7.5	20	0.00331831	2.64214	14.0433	0.0140433	0.280865	650	182.562	0.182562	0.046736	0.00839787	0.237696	0.0845629	0.0216481	0.00364972	0.109861
10	Native	Mixed	1000 - 1300	NE	2	161	Chirpine	11.8	10	20	0.0109359	4.07735	58.9889	0.0589889	1.17978	650	766.856	0.766856	0.144936	0.0774524	0.989244	0.355208	0.0671342	0.0336608	0.456003
10	Native	Mixed	1000 - 1300	NE	3	162	Chirpine	49.5	32	20	0.192442	8.00077	2983.24	2.98324	59.6648	650	38782.1	38.7821	7.32982	3.91699	50.0289	17.9639	3.39517	1.70233	23.0614
10	Native	Mixed	1000 - 1300	NE	4	163	Chirpine	16.1	13.5	20	0.0203583	4.97569	144.849	0.144849	2.89699	650	1883.04	1.88304	0.355895	0.190187	2.42912	0.872224	0.16485	0.0826553	1.11973
10	Native	Mixed	1000 - 1300	NE	5	164	Chirpine	20.5	18.9	20	0.0330064	5.77753	322.962	0.322962	6.45923	650	4198.5	4.1985	0.793517	0.424049	5.41607	1.94475	0.367557	0.184292	2.49659
10	Native	Mixed	1000 - 1300	NE	6	165	Chirpine	19.3	18.5	20	0.0292553	5.64008	281.484	0.281484	5.62969	650	3659.3	3.6593	0.93678	0.168328	4.7644	1.69499	0.433916	0.0731552	2.20206
10	Native	Mixed	1000 - 1300	NE	7	166	Chirpine	49.5	32.5	20	0.192442	8.0163	3029.94	3.02994	60.5988	650	39389.3	39.3893	7.44457	3.97831	50.8121	18.2451	3.44832	1.72898	23.4224
10	Native	Mixed	1000 - 1300	NE	8	167	Chirpine	11.6	14	20	0.0105683	4.38158	79.9643	0.0799643	1.59929	650	1039.54	1.03954	0.266121	0.0478186	1.35348	0.481513	0.123267	0.020782	0.625562
10	Native	Mixed	1000 - 1300	NE	9	168	Chirpine	50.2	33.2	20	0.197923	8.06466	3180.07	3.18007	63.6015	650	41341	41.341	10.5833	1.90168	53.8259	19.1491	4.90218	0.826472	24.8778
10	Native	Mixed	1000 - 1300	NE	10	169	Chirpine	15.8	14.3	20	0.0196067	4.99719	147.997	0.147997	2.95994	650	1923.96	1.92396	0.363629	0.19432	2.48191	0.89118	0.168433	0.0844516	1.14406
10	Native	Mixed	1000 - 1300	NE	11	170	Chirpine	17.8	14.5	20	0.0248846	5.24037	188.74	0.18874	3.77479	650	2453.61	2.45361	0.628125	0.112866	3.1946	1.13651	0.290948	0.0490517	1.47651
10	Native	Mixed	1000 - 1300	NE	12	171	Chirpine	45.7	31.5	20	0.16403	7.83135	2518.32	2.51832	50.3665	650	32738.2	32.7382	6.18752	3.30656	42.2323	15.1643	2.86606	1.43703	19.4674
10	Native	Mixed	1000 - 1300	NE	13	172	Chirpine	41	28.7	20	0.132025	7.52933	1861.86	1.86186	37.2372	650	24204.2	24.2042	4.57459	2.44462	31.2234	11.2114	2.11895	1.06243	14.3928
10	Native	Mixed	1000 - 1300	NE	14	173	Chirpine	53.8	30.9	20	0.227329	8.12595	3381.07	3.38107	67.6214	650	43953.9	43.9539	8.30729	4.43935	56.7006	20.3595	3.84794	1.92934	26.1367
10	Native	Mixed	1000 - 1300	NE	15	174	Chilaune	9.2	7	20	0.00664761	3.25038	25.8003	0.0258003	0.516005	690	356.044	0.356044	0.0672922	0.0359604	0.459296	0.160398	0.0303152	0.01565	0.206363
10	Native	Mixed	1000 - 1300	NE	16	175	Chilaune	10	9	20	0.00785398	3.65489	38.6632	0.0386632	0.773264	690	533.552	0.533552	0.100841	0.0538887	0.688282	0.240365	0.045429	0.0234524	0.309247
10	Native	Mixed	1000 - 1300	NE	17	176	Chilaune	9.8	7	20	0.00754296	3.36509	28.936	0.028936	0.57872	690	399.317	0.399317	0.0754708	0.040331	0.515118	0.179892	0.0339996	0.017552	0.231444
10	Native	Mixed	1000 - 1300	NE	18	177	Chilaune	16	9.1	20	0.0201062	4.51931	91.7721	0.0917721	1.83544	690	1266.46	1.26646	0.23936	0.127912	1.63373	0.570538	0.107832	0.0556673	0.734037
10	Native	Mixed	1000 - 1300	NE	19	178	Chilaune	8.2	7.9	20	0.00528102	3.1633	23.6485	0.0236485	0.47297	690	326.349	0.326349	0.06168	0.0329613	0.420991	0.14702	0.0277868	0.0143447	0.189152
10	Native	Mixed	1000 - 1300	NE	20	179	Chilaune	12.3	8.2	20	0.0118823	3.93696	51.2626	0.0512626	1.02525	690	707.424	0.707424	0.133703	0.0714498	0.912577	0.318694	0.0602332	0.031095	0.410023
10	Native	Mixed	1000 - 1300	NE	21	180	Chilaune	13.6	11.2	20	0.0145267	4.43339	84.2164	0.0842164	1.68433	690	1162.19	1.16219	0.219653	0.117381	1.49922	0.523565	0.0989538	0.0510842	0.673603
10	Native	Mixed	1000 - 1300	NE	22	181	Chilaune	9.5	7	20	0.00708822	3.30864	27.3479	0.0273479	0.546959	690	377.401	0.377401	0.0713289	0.0381175	0.486848	0.170019	0.0321337	0.0165888	0.218742
10	Native	Mixed	1000 - 1300	NE	23	182	Chilaune	22.3	18.2	20	0.0390571	5.82019	337.036	0.337036	6.74071	690	4651.09	4.65109	0.879057	0.46976	5.99991	2.09532	0.396015	0.20444	2.69577
10	Native	Mixed	1000 - 1300	NE	24	183	Chilaune	14.6	12	20	0.0167415	4.63169	102.688	0.102688	2.05375	690	1417.09	1.41709	0.26783	0.143126	1.82805	0.638399	0.120657	0.0622885	0.821345
10	Native	Mixed	1000 - 1300	NE	25	184	Chilaune	8.8	7	20	0.00608212	3.16968	23.7999	0.0237999	0.475999	690	328.439	0.328439	0.062075	0.0331723	0.423686	0.147962	0.0279648	0.0144366	0.190363
10	Native	Mixed	1000 - 1300	NE	26	185	Chilaune	11.5	12	20	0.0103869	4.19838	66.5783	0.0665783	1.33157	690	918.781	0.918781	0.17365	0.0927969	1.18523	0.413911	0.0782291	0.0403852	0.532525
10	Native	Mixed	1000 - 1300	NE	27	186	Chilaune	14	11	20	0.0153938	4.46787	87.1707	0.0871707	1.74341	690	1202.96	1.20296	0.227359	0.121499	1.55181	0.541932	0.102425	0.0528762	0.697233
10	Native	Mixed	1000 - 1300	NE	28	187	Chilaune	11.8	10	20	0.0109359	4.0615	58.0612	0.0580612	1.16122	690	801.245	0.801245	0.151435	0.0809258	1.03361	0.360961	0.0682216	0.0352189	0.464401
10	Native	Mixed	1000 - 1300	NE	29	188	Hadekafal	7.5	9	20	0.00441786	3.21536	24.9122	0.0249122	0.498245	740	368.701	0.368701	0.0696845	0.0372388	0.475624	0.173289	0.0327517	0.0175022	0.223543
10	Native	Mixed	1000 - 1300	NE	30	189	Hadekafal	11.5	13.8	20	0.0103869	4.35792	78.0943	0.0780943	1.56189	740	1155.8	1.1558	0.218445	0.116735	1.49098	0.543224	0.102669	0.0548656	0.700759
10	Native	Mixed	1000 - 1300	NE	31	190	Hadekafal	21.9	12.2	20	0.0376685	5.44869	232.454	0.232454	4.64908	740	3440.32	3.44032	0.65022	0.347472	4.43801	1.61695	0.305603	0.163312	2.08586
11	Native	Mixed	1000 - 1300	NW	1	191	Chirpine	34.5	16.5	20	0.093482	6.64272	767.18	0.76718	15.3436	650	9973.35	9.97335	1.88496	1.00731	12.8656	4.61965	0.873115	0.437776	5.93054
11	Native	Mixed	1000 - 1300	NW	2	192	Chirpine	50.5	25.5	20	0.200296	7.81175	2469.44	2.46944	49.3888	650	32102.8	32.1028	6.06742	3.24238	41.4125	14.87	2.81043	1.40914	19.0896
11	Native	Mixed	1000 - 1300	NW	3	193	Chirpine	23.7	14	20	0.044115	5.75586	316.038	0.316038	6.32076	650	4108.5	4.1085	0.776506	0.414958	5.29996	1.90306	0.359677	0.180341	2.44307
11	Native	Mixed	1000 - 1300	NW	4	194	Chirpine	21.1	16.5	20	0.0349667	5.69696	297.961	0.297961	5.95923	650	3873.5	3.8735	0.732091	0.391223	4.99681	1.7942	0.339104	0.170026	2.30333
11	Native	Mixed	1000 - 1300	NW	5	195	Chirpine	28.5	15	20	0.063794	6.17974	482.864	0.482864	9.65729	650	6277.24	6.27724	1.1864	0.634001	8.09764	2.90762	0.54954	0.275537	3.73269
11	Native	Mixed	1000 - 1300	NW	6	196	Chirpine	22.5	14	20	0.0397608	5.65592	285.979	0.285979	5.71958	650	3717.73	3.71773	0.70265	0.37549	4.79587	1.72205	0.325468	0.163188	2.21071
11	Native	Mixed	1000 - 1300	NW	7	197	Chirpine	31.8	18	20	0.0794226	6.57315	715.618	0.715618	14.3124	650	9303.04	9.30304	1.75827	0.939607	12.0009	4.30917	0.814433	0.408353	5.53195
11	Native	Mixed	1000 - 1300	NW	8	198	Chirpine	20.5	12	20	0.0330064	5.32242	204.878	0.204878	4.09756	650	2663.42	2.66342	0.503386	0.269005	3.43581	1.23369	0.233168	0.11691	1.58377
11	Native	Mixed	1000 - 1300	NW	9	199	Chirpine	18.8	15.5	20	0.0277591	5.41232	224.151	0.224151	4.48303	650	2913.97	2.91397	0.55074	0.294311	3.75902	1.34975	0.255103	0.127907	1.73276
11	Native	Mixed	1000 - 1300	NW	10	200	Chirpine	31.5	17.5	20	0.0779311	6.52669	683.133	0.683133	13.6627	650	8880.73	8.88073	1.67846	0.896954	11.4561	4.11356	0.777462	0.389816	5.28083
11	Native	Mixed	1000 - 1300	NW	11	201	Chirpine	22.2	14.2	20	0.0387076	5.64431	282.679	0.282679	5.65357	650	3674.82	3.67482	0.694541	0.371157	4.74052	1.70218	0.321712	0.161305	2.18519
11	Native	Mixed	1000 - 1300	NW	12	202	Chirpine	48.5	29.5	20	0.184745	7.88001	2643.9	2.6439	52.8779	650	34370.6	34.3706	6.49605	3.47143	44.3381	15.9205	3.00897	1.50869	20.4381
11	Native	Mixed	1000 - 1300	NW	13	203	Chirpine	31.9	16	20	0.0799229	6.46118	639.815	0.639815	12.7963	650	8317.6	8.3176	1.57203	0.840077	10.7297	3.85271	0.728162	0.365098	4.94597
11	Native	Mixed	1000 - 1300	NW	14	204	Chilaune	8.1	8	20	0.005153	3.15369	23.4224	0.0234224	0.468448	690	323.229	0.323229	0.0610903	0.0326461	0.416966	0.145615	0.0275212	0.0142076	0.187343
11	Native	Mixed	1000 - 1300	NW	15	205	Chilaune	29.7	16.8	20	0.0692792	6.25982	523.125	0.523125	10.4625	690	7219.12	7.21912	1.36441	0.729132	9.31267	3.25222	0.614669	0.317318	4.1842
11	Native	Mixed	1000 - 1300	NW	16	206	Chilaune	17.3	19	20	0.0235062	5.4026	221.982	0.221982	4.43964	690	3063.35	3.06335	0.578974	0.309399	3.95172	1.38004	0.260828	0.13465	1.77552
12	Native	Mixed	> 1300	NW	1	207	Chirpine	24.5	16.8	20	0.0471435	6.00239	404.393	0.404393	8.08786	650	5257.11	5.25711	0.993594	0.530968	6.78167	2.43509	0.460233	0.230759	3.12608
12	Native	Mixed	> 1300	NW	2	208	Chirpine	17.5	14	20	0.0240528	5.17251	176.358	0.176358	3.52716	650	2292.65	2.29265	0.433311	0.231558	2.95752	1.06196	0.20071	0.100635	1.3633
12	Native	Mixed	> 1300	NW	3	209	Chilaune	18.9	9	20	0.0280552	4.81059	122.804	0.122804	2.45609	690	1694.7	1.6947	0.320299	0.171165	2.18616	0.763463	0.144294	0.0744909	0.982248
12	Native	Mixed	> 1300	NW	4	210	Chirpine	24	17.1	20	0.0452389	5.98046	395.622	0.395622	7.91244	650	5143.09	5.14309	0.972043	0.519452	6.63458	2.38228	0.45025	0.225754	3.05828
12	Native	Mixed	> 1300	NW	5	211	Chilaune	18	11	20	0.0254469	4.92413	137.57	0.13757	2.75139	690	1898.46	1.89846	0.358809	0.191745	2.44901	0.855257	0.161643	0.0834472	1.10035
12	Native	Mixed	> 1300	NW	6	212	Chirpine	21.9	15.8	20	0.0376685	5.72511	306.467	0.306467	6.12935	650	3984.07	3.98407	0.75299	0.402392	5.13946	1.84542	0.348785	0.174879	2.36909
12	Native	Mixed	> 1300	NW	7	213	Chirpine	32.2	16	20	0.0814332	6.47918	651.439	0.651439	13.0288	650	8468.71	8.46871	1.60059	0.85534	10.9246	3.92271	0.741392	0.371731	5.03583
12	Native	Mixed	> 1300	NW	8	214	Chirpine	50	31.5	20	0.19635	8.00432	2993.86	2.99386	59.8772	650	38920.2	38.9202	7.35591	3.93094	50.207	18.0278	3.40726	1.70839	23.1435
12	Native	Mixed	> 1300	NW	9	215	Chilaune	16.8	9	20	0.0221671	4.59676	99.1623	0.0991623	1.98325	690	1368.44	1.36844	0.258635	0.138212	1.76529	0.616482	0.116515	0.06015	0.793147
12	Native	Mixed	> 1300	NW	10	216	Chilaune	18	9.8	20	0.0254469	4.80779	122.46	0.12246	2.4492	690	1689.95	1.68995	0.3194	0.170685	2.18004	0.761322	0.14389	0.0742821	0.979494
12	Native	Mixed	> 1300	NW	11	217	Chirpine	24.5	18.9	20	0.0471435	6.12039	455.044	0.455044	9.10088	650	5915.57	5.91557	1.11804	0.597473	7.63109	2.74009	0.517878	0.259662	3.51763
12	Native	Mixed	> 1300	NW	12	218	Chirpine	30	19.8	20	0.0706858	6.55656	703.845	0.703845	14.0769	650	9149.98	9.14998	1.72935	0.924148	11.8035	4.23827	0.801033	0.401635	5.44094
12	Native	Mixed	> 1300	NW	13	219	Chirpine	27.5	12.6	20	0.0593957	5.93635	378.55	0.37855	7.571	650	4921.15	4.92115	0.930097	0.497036	6.34828	2.27948	0.430821	0.216012	2.92631
12	Native	Mixed	> 1300	NW	14	220	Chirpine	22.7	14.5	20	0.0404708	5.7081	301.298	0.301298	6.02595	650	3916.87	3.91687	0.740288	0.395604	5.05276	1.81429	0.342901	0.171929	2.32912
12	Native	Mixed	> 1300	NW	15	221	Chirpine	20	16.5	20	0.0314159	5.59398	268.803	0.268803	5.37605	650	3494.44	3.49444	0.660448	0.352938	4.50782	1.61862	0.30592	0.153387	2.07793
12	Native	Mixed	> 1300	NW	16	222	Chirpine	23	21	20	0.0415476	6.10443	447.837	0.447837	8.95675	650	5821.89	5.82189	1.10034	0.58801	7.51023	2.6967	0.509676	0.255549	3.46192
12	Native	Mixed	> 1300	NW	17	223	Chilaune	20.5	10.5	20	0.0330064	5.11339	166.232	0.166232	3.32465	690	2294.01	2.29401	0.433567	0.231695	2.95927	1.03345	0.195322	0.100834	1.32961
12	Native	Mixed	> 1300	NW	18	224	Chirpine	30.3	24.6	20	0.0721066	6.79317	891.74	0.89174	17.8348	650	11592.6	11.5926	2.191	1.17085	14.9545	5.3697	1.01487	0.508853	6.89343
13	Native	Monospecific	> 1300	NW	1	225	Chirpine	41.3	30.3	20	0.133965	7.59771	1993.62	1.99362	39.8724	650	25917.1	25.9171	4.89833	2.61762	33.433	12.0048	2.26891	1.13762	15.4113
13	Native	Monospecific	> 1300	NW	2	226	Chirpine	54.4	32.5	20	0.232428	8.19786	3633.17	3.63317	72.6634	650	47231.2	47.2312	8.9267	4.77035	60.9283	21.8775	4.13485	2.0732	28.0855
13	Native	Monospecific	> 1300	NW	3	227	Chirpine	54.8	31.7	20	0.235858	8.18698	3593.86	3.59386	71.8772	650	46720.2	46.7202	8.83011	4.71874	60.269	21.6408	4.09011	2.05076	27.7817
13	Native	Monospecific	> 1300	NW	4	228	Chirpine	46	32.5	20	0.16619	7.87525	2631.33	2.63133	52.6267	650	34207.3	34.2073	6.46519	3.45494	44.1275	15.8448	2.99467	1.50152	20.341
13	Native	Monospecific	> 1300	NW	5	229	Chirpine	48.8	33.1	20	0.187038	8.00723	3002.59	3.00259	60.0519	650	39033.7	39.0337	7.37737	3.94241	50.3535	18.0804	3.4172	1.71337	23.211
13	Native	Monospecific	> 1300	NW	7	230	Chirpine	50.45	31.5	20	0.1999	8.02155	3045.9	3.0459	60.9181	650	39596.7	39.5967	7.48378	3.99927	51.0798	18.3412	3.46649	1.73808	23.5458
14	Native	Mixed	> 1300	SW	1	231	Chirpine	18.6	10.5	20	0.0271716	5.00154	148.643	0.148643	2.97285	650	1932.35	1.93235	0.365215	0.195168	2.49273	0.895066	0.169167	0.0848198	1.14905
14	Native	Mixed	> 1300	SW	2	232	Chirpine	28	16	20	0.0615752	6.21035	497.876	0.497876	9.95753	650	6472.39	6.47239	1.22328	0.653712	8.34939	2.99801	0.566624	0.284103	3.84874
14	Native	Mixed	> 1300	SW	3	233	Chirpine	22	11.5	20	0.0380133	5.41561	224.889	0.224889	4.49778	650	2923.56	2.92356	0.552553	0.295279	3.77139	1.35419	0.255942	0.128328	1.73846
14	Native	Mixed	> 1300	SW	4	234	Chirpine	24	13.5	20	0.0452389	5.74362	312.193	0.312193	6.24386	650	4058.51	4.05851	0.767058	0.409909	5.23548	1.8799	0.355301	0.178147	2.41335
14	Native	Mixed	> 1300	SW	5	235	Chirpine	25	14	20	0.0490874	5.85858	350.226	0.350226	7.00452	650	4552.94	4.55294	0.860506	0.459847	5.87329	2.10892	0.398586	0.199849	2.70736
14	Native	Mixed	> 1300	SW	6	236	Chirpine	17	11.3	20	0.022698	4.9021	134.572	0.134572	2.69143	650	1749.43	1.74943	0.330642	0.176692	2.25676	0.810336	0.153153	0.0767905	1.04028
14	Native	Mixed	> 1300	SW	7	237	Chirpine	22	14.5	20	0.0380133	5.64785	283.681	0.283681	5.67362	650	3687.85	3.68785	0.697004	0.372473	4.75733	1.70821	0.322852	0.161877	2.19294
14	Native	Mixed	> 1300	SW	8	238	Chirpine	21	15	20	0.0346361	5.59233	268.361	0.268361	5.36723	650	3488.7	3.4887	0.659364	0.352358	4.50042	1.61596	0.305417	0.153135	2.07452
14	Native	Mixed	> 1300	SW	9	239	Chirpine	19.5	10.5	20	0.0298648	5.09244	162.786	0.162786	3.25572	650	2116.22	2.11622	0.399965	0.213738	2.72992	0.980231	0.185264	0.0928904	1.25838
14	Native	Mixed	> 1300	SW	10	240	Chirpine	12.2	8.4	20	0.0116899	3.96679	52.8146	0.0528146	1.05629	650	686.59	0.68659	0.129765	0.0693456	0.885701	0.318028	0.0601074	0.0301376	0.408273
14	Native	Mixed	> 1300	SW	11	241	Chirpine	18	14.5	20	0.0254469	5.26186	192.84	0.19284	3.8568	650	2506.92	2.50692	0.473807	0.253199	3.23392	1.1612	0.219468	0.11004	1.49071
14	Native	Mixed	> 1300	SW	12	242	Chirpine	17	10.3	20	0.022698	4.80926	122.641	0.122641	2.45282	650	1594.33	1.59433	0.301329	0.161028	2.05669	0.738495	0.139575	0.0699826	0.948053
14	Native	Mixed	> 1300	SW	13	243	Chirpine	22.9	15	20	0.0411871	5.75894	317.011	0.317011	6.34023	650	4121.15	4.12115	0.778897	0.416236	5.31628	1.90892	0.360785	0.180896	2.4506
14	Native	Mixed	> 1300	SW	14	244	Chirpine	16	12	20	0.0201062	4.8457	127.193	0.127193	2.54385	650	1653.5	1.6535	0.312512	0.167004	2.13302	0.765903	0.144756	0.0725799	0.983238
14	Native	Mixed	> 1300	SW	15	245	Chirpine	9	11	20	0.00636173	3.65181	38.5445	0.0385445	0.770889	650	501.078	0.501078	0.0947038	0.0506089	0.646391	0.232099	0.0438668	0.0219946	0.297961
14	Native	Mixed	> 1300	SW	16	246	Chirpine	10.2	11.5	20	0.00817128	3.9371	51.2697	0.0512697	1.02539	650	666.506	0.666506	0.12597	0.0673171	0.859793	0.308726	0.0583492	0.029256	0.396331
14	Native	Mixed	> 1300	SW	17	247	Chirpine	15.3	11.3	20	0.0183854	4.69943	109.885	0.109885	2.1977	650	1428.51	1.42851	0.269988	0.144279	1.84277	0.661684	0.125058	0.0627037	0.849446
14	Native	Mixed	> 1300	SW	18	248	Chirpine	23.4	15	20	0.0430053	5.80048	330.459	0.330459	6.60918	650	4295.97	4.29597	0.811938	0.433893	5.5418	1.98989	0.37609	0.18857	2.55455
14	Native	Mixed	> 1300	SW	19	249	Chirpine	16.5	12.5	20	0.0213825	4.94579	140.582	0.140582	2.81164	650	1827.57	1.82757	0.34541	0.184584	2.35756	0.846529	0.159994	0.0802203	1.08674
14	Native	Mixed	> 1300	SW	20	250	Chirpine	11.9	8.5	20	0.011122	3.93075	50.9454	0.0509454	1.01891	650	662.29	0.66229	0.125173	0.0668913	0.854354	0.306773	0.05798	0.0290709	0.393824
14	Native	Mixed	> 1300	SW	21	251	Chirpine	25.4	16	20	0.0506707	6.0229	412.773	0.412773	8.25545	650	5366.04	5.36604	1.01418	0.54197	6.9222	2.48555	0.469769	0.23554	3.19086
14	Native	Mixed	> 1300	SW	22	252	Chirpine	16.5	10	20	0.0213825	4.72222	112.418	0.112418	2.24836	650	1461.43	1.46143	0.276211	0.147605	1.88525	0.676936	0.127941	0.064149	0.869026
14	Native	Mixed	> 1300	SW	23	253	Chirpine	16	11.5	20	0.0201062	4.80306	121.883	0.121883	2.43766	650	1584.48	1.58448	0.299467	0.160032	2.04398	0.733931	0.138713	0.0695501	0.942194
14	Native	Mixed	> 1300	SW	24	254	Chirpine	19.5	12	20	0.0298648	5.22622	186.088	0.186088	3.72176	650	2419.15	2.41915	0.457218	0.244334	3.1207	1.12055	0.211784	0.106187	1.43852
14	Native	Mixed	> 1300	SW	25	255	Chirpine	20	12.5	20	0.0314159	5.31582	203.531	0.203531	4.07062	650	2645.9	2.6459	0.500076	0.267236	3.41322	1.22558	0.231635	0.116141	1.57336
14	Native	Mixed	> 1300	SW	26	256	Chirpine	16.8	12	20	0.0221671	4.93955	139.707	0.139707	2.79415	650	1816.2	1.8162	0.343261	0.183436	2.34289	0.841262	0.158999	0.0797212	1.07998
14	Native	Mixed	> 1300	SW	27	257	Chirpine	26.5	14.5	20	0.0551546	6.00582	405.783	0.405783	8.11565	650	5275.17	5.27517	0.997008	0.532792	6.80497	2.44346	0.461814	0.231552	3.13683
14	Native	Mixed	> 1300	SW	28	258	Chirpine	14	9.5	20	0.0153938	4.3548	77.8509	0.0778509	1.55702	650	1012.06	1.01206	0.19128	0.102218	1.30556	0.468787	0.0886008	0.0444241	0.601812
14	Native	Mixed	> 1300	SW	29	259	Chirpine	22.2	15.6	20	0.0387076	5.73852	310.604	0.310604	6.21208	650	4037.85	4.03785	0.763154	0.407823	5.20883	1.87033	0.353493	0.17724	2.40106
14	Native	Mixed	> 1300	SW	30	260	Chilaune	23	8.6	20	0.0415476	5.12124	167.544	0.167544	3.35088	690	2312.1	2.3121	0.436988	0.233523	2.98261	1.0416	0.196863	0.101629	1.34009
14	Native	Mixed	> 1300	SW	31	261	Chilaune	11	8.5	20	0.00950332	3.77035	43.3954	0.0433954	0.867908	690	598.857	0.598857	0.113184	0.0604845	0.772525	0.269785	0.0509893	0.0263229	0.347097
14	Native	Mixed	> 1300	SW	32	262	Chilaune	18.1	12	20	0.0257304	5.02183	151.688	0.151688	3.03376	690	2093.3	2.0933	0.395633	0.211423	2.70035	0.943029	0.178233	0.0920112	1.21327
14	Native	Mixed	> 1300	SW	33	263	Chilaune	15.5	9	20	0.0188692	4.45054	85.6732	0.0856732	1.71346	690	1182.29	1.18229	0.223453	0.119411	1.52515	0.532622	0.100665	0.0519678	0.685255
14	Native	Mixed	> 1300	SW	34	264	Chilaune	16.5	8	20	0.0213825	4.44541	85.2352	0.0852352	1.7047	690	1176.25	1.17625	0.22231	0.118801	1.51736	0.529899	0.100151	0.0517021	0.681752
14	Native	Mixed	> 1300	SW	35	265	Chilaune	17.2	10	20	0.0232352	4.7456	115.076	0.115076	2.30153	690	1588.06	1.58806	0.300142	0.160394	2.04859	0.715419	0.135214	0.0698033	0.920436
14	Native	Mixed	> 1300	SW	36	266	Katus	10	9	20	0.00785398	3.74777	42.4265	0.0424265	0.848529	740	627.911	0.627911	0.118675	0.0634191	0.810006	0.295118	0.0557774	0.029807	0.380703
14	Native	Mixed	> 1300	SW	37	267	Katus	14	9.5	20	0.0153938	4.41494	82.6769	0.0826769	1.65354	740	1223.62	1.22362	0.231264	0.123585	1.57847	0.575101	0.108694	0.0580852	0.74188
15	Native	Mixed	> 1300	NE	1	268	Chirpine	17.2	15	20	0.0232352	5.20838	182.797	0.182797	3.65595	650	2376.37	2.37637	0.449133	0.240013	3.06551	1.10073	0.208039	0.10431	1.41308
15	Native	Mixed	> 1300	NE	2	269	Chirpine	24.2	18	20	0.0459961	6.04781	423.186	0.423186	8.46373	650	5501.42	5.50142	1.03977	0.555644	7.09684	2.54826	0.481621	0.241483	3.27136
15	Native	Mixed	> 1300	NE	3	270	Chirpine	33.7	19.8	20	0.0891969	6.78026	880.299	0.880299	17.606	650	11443.9	11.4439	2.1629	1.15583	14.7626	5.30081	1.00185	0.502325	6.80499
15	Native	Mixed	> 1300	NE	4	271	Chirpine	26.8	18.1	20	0.0564104	6.24966	517.834	0.517834	10.3567	650	6731.85	6.73185	1.27232	0.679916	8.68408	3.11819	0.589338	0.295492	4.00302
15	Native	Mixed	> 1300	NE	5	272	Chirpine	24.7	18	20	0.0479164	6.08715	440.165	0.440165	8.8033	650	5722.14	5.72214	1.08149	0.577937	7.38157	2.6505	0.500944	0.251171	3.40261
15	Native	Mixed	> 1300	NE	6	273	Chirpine	27.4	18.2	20	0.0589646	6.29776	543.355	0.543355	10.8671	650	7063.62	7.06362	1.33502	0.713426	9.11207	3.27187	0.618383	0.310055	4.20031
15	Native	Mixed	> 1300	NE	7	274	Chirpine	21.8	17.5	20	0.0373253	5.81869	336.532	0.336532	6.73064	650	4374.91	4.37491	0.826859	0.441866	5.64364	2.02646	0.383001	0.192035	2.6015
15	Native	Mixed	> 1300	NE	8	275	Chirpine	28.2	19	20	0.062458	6.39622	599.574	0.599574	11.9915	650	7794.46	7.79446	1.47315	0.787241	10.0549	3.61039	0.682365	0.342135	4.63489
15	Native	Mixed	> 1300	NE	9	276	Chirpine	31.7	20.1	20	0.0789239	6.67765	794.447	0.794447	15.8889	650	10327.8	10.3278	1.95196	1.04311	13.3229	4.78384	0.904146	0.453335	6.14132
15	Native	Mixed	> 1300	NE	10	277	Chirpine	28.2	18	20	0.062458	6.34205	567.959	0.567959	11.3592	650	7383.47	7.38347	1.39548	0.74573	9.52467	3.42002	0.646384	0.324094	4.3905
15	Native	Mixed	> 1300	NE	11	278	Chirpine	28	18.2	20	0.0615752	6.33943	566.473	0.566473	11.3295	650	7364.15	7.36415	1.39182	0.743779	9.49975	3.41107	0.644693	0.323246	4.37901
15	Native	Mixed	> 1300	NE	12	279	Chirpine	40.5	28.8	20	0.128825	7.50921	1824.78	1.82478	36.4956	650	23722.1	23.7221	4.48348	2.39594	30.6016	10.9881	2.07675	1.04127	14.1061
15	Native	Mixed	> 1300	NE	13	280	Chirpine	19	7	20	0.0283529	4.63624	103.155	0.103155	2.06311	650	1341.02	1.34102	0.253453	0.135443	1.72991	0.62116	0.117399	0.0588635	0.797423
15	Native	Mixed	> 1300	NE	14	281	Chirpine	15.8	17.7	20	0.0196067	5.2109	183.26	0.18326	3.66519	650	2382.37	2.38237	0.450269	0.24062	3.07326	1.10352	0.208564	0.104573	1.41665
15	Native	Mixed	> 1300	NE	15	282	Chirpine	41	29	20	0.132025	7.53975	1881.36	1.88136	37.6272	650	24457.7	24.4577	4.6225	2.47022	31.5504	11.3288	2.14114	1.07356	14.5435
15	Native	Mixed	> 1300	NE	16	283	Chirpine	20	18	20	0.0314159	5.68115	293.288	0.293288	5.86576	650	3812.74	3.81274	0.720608	0.385087	4.91844	1.76606	0.333786	0.167359	2.26721
15	Native	Mixed	> 1300	NE	17	284	Chilaune	9.8	10	20	0.00754296	3.72433	41.4434	0.0414434	0.828868	690	571.919	0.571919	0.108093	0.0577638	0.737776	0.25765	0.0486958	0.0251388	0.331484
15	Native	Mixed	> 1300	NE	18	285	Chilaune	10.6	7.5	20	0.00882473	3.57704	35.7675	0.0357675	0.715351	690	493.592	0.493592	0.0932889	0.0498528	0.636734	0.222363	0.0420266	0.0216959	0.286086
15	Native	Mixed	> 1300	NE	19	286	Chilaune	8	7.5	20	0.00502655	3.06614	21.4588	0.0214588	0.429177	690	296.132	0.296132	0.0559689	0.0299093	0.38201	0.133407	0.025214	0.0130165	0.171638
15	Native	Mixed	> 1300	NE	20	287	Chilaune	8.6	8.5	20	0.0058088	3.3235	27.7573	0.0277573	0.555146	690	383.051	0.383051	0.0723966	0.0386881	0.494135	0.172564	0.0326147	0.0168371	0.222016
15	Native	Mixed	> 1300	NE	21	288	Chilaune	12.5	9.5	20	0.0122718	4.11446	61.2192	0.0612192	1.22438	690	844.825	0.844825	0.159672	0.0853274	1.08982	0.380594	0.0719322	0.0371345	0.489661
15	Native	Mixed	> 1300	NE	22	289	Chilaune	11.9	10	20	0.011122	4.07682	58.9576	0.0589576	1.17915	690	813.615	0.813615	0.153773	0.0821752	1.04956	0.366534	0.0692749	0.0357626	0.471571
15	Native	Mixed	> 1300	NE	23	290	Chilaune	13.1	9	20	0.0134782	4.14512	63.1253	0.0631253	1.26251	690	871.13	0.87113	0.164643	0.0879841	1.12376	0.392444	0.0741719	0.0382907	0.504906
15	Native	Mixed	> 1300	NE	24	291	Chilaune	10.3	9.5	20	0.00833229	3.76301	43.0778	0.0430778	0.861556	690	594.474	0.594474	0.112356	0.0600419	0.766871	0.267811	0.0506162	0.0261302	0.344557
15	Native	Mixed	> 1300	NE	25	292	Chilaune	8.4	9	20	0.00554177	3.33835	28.1726	0.0281726	0.563452	690	388.782	0.388782	0.0734797	0.0392669	0.501528	0.175146	0.0331026	0.017089	0.225338
15	Native	Mixed	> 1300	NE	26	293	Chilaune	13.9	10	20	0.0151747	4.35886	78.1678	0.0781678	1.56336	690	1078.72	1.07872	0.203877	0.10895	1.39154	0.485961	0.0918467	0.0474152	0.625223
15	Native	Mixed	> 1300	NE	27	294	Chilaune	10.3	11	20	0.00833229	3.91067	49.9323	0.0499323	0.998645	690	689.065	0.689065	0.130233	0.0695956	0.888894	0.310424	0.0586701	0.030288	0.399382
15	Native	Mixed	> 1300	NE	28	295	Chilaune	9.5	9	20	0.00708822	3.56176	35.2253	0.0352253	0.704506	690	486.109	0.486109	0.0918747	0.049097	0.627081	0.218992	0.0413895	0.021367	0.281749
15	Native	Mixed	> 1300	NE	29	296	Chilaune	10.3	11	20	0.00833229	3.91067	49.9323	0.0499323	0.998645	690	689.065	0.689065	0.130233	0.0695956	0.888894	0.310424	0.0586701	0.030288	0.399382
16	Native	Monospecific	> 1300	NE	1	297	Chirpine	37.4	29.6	20	0.109858	7.38349	1609.2	1.6092	32.1841	650	20919.6	20.9196	3.95381	2.11288	26.9863	9.68998	1.83141	0.91826	12.4396
16	Native	Monospecific	> 1300	NE	2	298	Chirpine	43	33.5	20	0.14522	7.77589	2382.45	2.38245	47.6491	650	30971.9	30.9719	5.85369	3.12816	39.9537	14.3462	2.71143	1.3595	18.4171
16	Native	Monospecific	> 1300	NE	3	299	Chirpine	51.5	34	20	0.208307	8.13769	3421.02	3.42102	68.4203	650	44473.2	44.4732	8.40544	4.4918	57.3705	20.6	3.8934	1.95213	26.4455
16	Native	Monospecific	> 1300	NE	4	300	Chirpine	64.6	33.2	20	0.327759	8.54977	5165.54	5.16554	103.311	650	67152	67.152	12.6917	6.78236	86.6261	31.1048	5.87881	2.94761	39.9312
16	Native	Monospecific	> 1300	NE	5	301	Chirpine	52	33.5	20	0.212372	8.14143	3433.84	3.43384	68.6768	650	44639.9	44.6399	8.43695	4.50863	57.5855	20.6772	3.90799	1.95945	26.5447
16	Native	Monospecific	> 1300	NE	6	302	Chirpine	43.1	33.1	20	0.145896	7.76832	2364.49	2.36449	47.2899	650	30738.4	30.7384	5.80956	3.10458	39.6525	14.238	2.69099	1.34925	18.2783
17	Native	Monospecific	< 1000	NE	1	303	Chirpine	55	33.8	20	0.237583	8.25826	3859.35	3.85935	77.1871	650	50171.6	50.1716	9.48243	5.06733	64.7214	23.2395	4.39226	2.20226	29.834
17	Native	Monospecific	< 1000	NE	2	304	Chirpine	49	33.1	20	0.188574	8.0151	3026.31	3.02631	60.5262	650	39342	39.342	7.43564	3.97354	50.7512	18.2232	3.44419	1.7269	23.3943
17	Native	Monospecific	< 1000	NE	3	305	Chirpine	67	35.5	20	0.352565	8.68704	5925.62	5.92562	118.512	650	77033.1	77.0331	14.5593	7.78034	99.3727	35.6817	6.74385	3.38134	45.8069
17	Native	Monospecific	< 1000	NE	4	306	Chirpine	52.7	34	20	0.218128	8.182	3575.99	3.57599	71.5199	650	46487.9	46.4879	8.78622	4.69528	59.9694	21.5332	4.06978	2.04057	27.6435
17	Native	Monospecific	< 1000	NE	5	307	Chirpine	54	33.1	20	0.229022	8.20199	3648.21	3.64821	72.9643	650	47426.8	47.4268	8.96366	4.79011	61.1806	21.9681	4.15197	2.08178	28.2018
17	Native	Monospecific	< 1000	NE	6	308	Chirpine	42.7	31	20	0.143201	7.68471	2174.85	2.17485	43.4969	650	28273	28.273	5.3436	2.85557	36.4722	13.0961	2.47515	1.24103	16.8122
18	Native	Mixed	> 1300	SE	1	309	Chirpine	14.5	13	20	0.016513	4.73655	114.04	0.11404	2.2808	650	1482.52	1.48252	0.280196	0.149734	1.91245	0.686702	0.129787	0.0650745	0.881563
18	Native	Mixed	> 1300	SE	2	310	Chirpine	26	18	20	0.0530929	6.18581	485.807	0.485807	9.71615	650	6315.5	6.3155	1.19363	0.637865	8.14699	2.92534	0.552889	0.277216	3.75544
18	Native	Mixed	> 1300	SE	3	311	Chirpine	16	12	20	0.0201062	4.8457	127.193	0.127193	2.54385	650	1653.5	1.6535	0.312512	0.167004	2.13302	0.765903	0.144756	0.0725799	0.983238
18	Native	Mixed	> 1300	SE	4	312	Chirpine	14.1	14	20	0.0156145	4.75699	116.395	0.116395	2.3279	650	1513.13	1.51313	0.285982	0.152827	1.95194	0.700884	0.132467	0.0664184	0.899769
18	Native	Mixed	> 1300	SE	5	313	Chirpine	10.4	14.1	20	0.00849487	4.17867	65.2787	0.0652787	1.30557	650	848.623	0.848623	0.16039	0.085711	1.09472	0.393082	0.0742926	0.03725	0.504625
18	Native	Mixed	> 1300	SE	6	314	Chirpine	14.8	15.7	20	0.0172034	4.96501	143.31	0.14331	2.86619	650	1863.03	1.86303	0.352112	0.188166	2.4033	0.862954	0.163098	0.0817768	1.10783
18	Native	Mixed	> 1300	SE	7	315	Chirpine	11.8	13.9	20	0.0109359	4.40728	82.0459	0.0820459	1.64092	650	1066.6	1.0666	0.201587	0.107726	1.37591	0.494048	0.093375	0.0468178	0.63424
18	Native	Mixed	> 1300	SE	8	316	Chirpine	22.9	18.8	20	0.0411871	5.98517	397.491	0.397491	7.94983	650	5167.39	5.16739	0.976636	0.521906	6.66593	2.39353	0.452378	0.22682	3.07273
18	Native	Mixed	> 1300	SE	9	317	Chirpine	16	18	20	0.0201062	5.25194	190.936	0.190936	3.81872	650	2482.17	2.48217	0.46913	0.250699	3.202	1.14974	0.217301	0.108954	1.47599
18	Native	Mixed	> 1300	SE	10	318	Chirpine	10.2	13	20	0.00817128	4.05994	57.9706	0.0579706	1.15941	650	753.617	0.753617	0.142434	0.0761154	0.972167	0.349076	0.0659753	0.0330797	0.448131
18	Native	Mixed	> 1300	SE	11	319	Chirpine	20	18	20	0.0314159	5.68115	293.288	0.293288	5.86576	650	3812.74	3.81274	0.720608	0.385087	4.91844	1.76606	0.333786	0.167359	2.26721
18	Native	Mixed	> 1300	SE	12	320	Chirpine	14.9	16.3	20	0.0174366	5.01554	150.737	0.150737	3.01474	650	1959.58	1.95958	0.370361	0.197918	2.52786	0.907678	0.171551	0.086015	1.16524
18	Native	Mixed	> 1300	SE	13	321	Chirpine	26.6	17.9	20	0.0555716	6.22411	504.776	0.504776	10.0955	650	6562.09	6.56209	1.24023	0.662771	8.46509	3.03956	0.574477	0.28804	3.90208
18	Native	Mixed	> 1300	SE	14	322	Chirpine	18.8	17.3	20	0.0277591	5.5224	250.234	0.250234	5.00468	650	3253.04	3.25304	0.614825	0.328557	4.19642	1.50681	0.284787	0.142791	1.93439
18	Native	Mixed	> 1300	SE	15	323	Chirpine	15.7	17	20	0.0193593	5.15826	173.862	0.173862	3.47724	650	2260.21	2.26021	0.427179	0.228281	2.91567	1.04693	0.197869	0.0992109	1.34401
18	Native	Mixed	> 1300	SE	16	324	Chirpine	17.3	17.3	20	0.0235062	5.36246	213.248	0.213248	4.26496	650	2772.23	2.77223	0.523951	0.279995	3.57617	1.2841	0.242694	0.121686	1.64848
18	Native	Mixed	> 1300	SE	17	325	Chirpine	16.5	16	20	0.0213825	5.19312	180.029	0.180029	3.60059	650	2340.38	2.34038	0.442332	0.236379	3.01909	1.08407	0.204888	0.10273	1.39168
18	Native	Mixed	> 1300	SE	18	326	Chirpine	20.1	17	20	0.0317309	5.63348	279.634	0.279634	5.59268	650	3635.24	3.63524	0.68706	0.367159	4.68946	1.68384	0.318246	0.159567	2.16166
18	Native	Mixed	> 1300	SE	19	327	Chirpine	21.2	18	20	0.0352989	5.79323	328.073	0.328073	6.56145	650	4264.94	4.26494	0.806074	0.430759	5.50178	1.97552	0.373374	0.187208	2.5361
18	Native	Mixed	> 1300	SE	20	328	Chirpine	24.2	16.5	20	0.0459961	5.96064	387.857	0.387857	7.75713	650	5042.14	5.04214	0.952964	0.509256	6.50436	2.33552	0.441413	0.221323	2.99825
18	Native	Mixed	> 1300	SE	21	329	Chirpine	25	17	20	0.0490874	6.0531	425.432	0.425432	8.50863	650	5530.61	5.53061	1.04529	0.558592	7.13449	2.56178	0.484176	0.242764	3.28872
18	Native	Mixed	> 1300	SE	22	330	Chirpine	15.2	14	20	0.0181458	4.90148	134.489	0.134489	2.68978	650	1748.36	1.74836	0.33044	0.176584	2.25538	0.80984	0.15306	0.0767435	1.03964
18	Native	Mixed	> 1300	SE	23	331	Chirpine	14.6	14.1	20	0.0167415	4.83115	125.355	0.125355	2.50709	650	1629.61	1.62961	0.307997	0.164591	2.1022	0.754836	0.142664	0.0715311	0.969031
18	Native	Mixed	> 1300	SE	24	332	Chirpine	10.3	12.9	20	0.00833229	4.07096	58.6135	0.0586135	1.17227	650	761.975	0.761975	0.144013	0.0769595	0.982948	0.352947	0.066707	0.0334466	0.453101
18	Native	Mixed	> 1300	SE	25	333	Chirpine	14.8	15	20	0.0172034	4.91931	136.908	0.136908	2.73816	650	1779.81	1.77981	0.336384	0.179761	2.29595	0.824407	0.155813	0.0781239	1.05834
18	Native	Mixed	> 1300	SE	26	334	Chirpine	20.5	17.2	20	0.0330064	5.6831	293.86	0.29386	5.87719	650	3820.17	3.82017	0.722013	0.385838	4.92802	1.7695	0.334436	0.167685	2.27163
18	Native	Mixed	> 1300	SE	27	335	Chilaune	14	16	20	0.0153938	4.84526	127.136	0.127136	2.54273	690	1754.48	1.75448	0.331597	0.177203	2.26328	0.790394	0.149384	0.0771186	1.0169
19	Native	Mixed	< 1000	NE	1	336	Chirpine	17.2	15	20	0.0232352	5.20838	182.797	0.182797	3.65595	650	2376.37	2.37637	0.449133	0.240013	3.06551	1.10073	0.208039	0.10431	1.41308
19	Native	Mixed	< 1000	NE	2	337	Chirpine	24.2	18	20	0.0459961	6.04781	423.186	0.423186	8.46373	650	5501.42	5.50142	1.03977	0.555644	7.09684	2.54826	0.481621	0.241483	3.27136
19	Native	Mixed	< 1000	NE	3	338	Chirpine	33.7	19.8	20	0.0891969	6.78026	880.299	0.880299	17.606	650	11443.9	11.4439	2.1629	1.15583	14.7626	5.30081	1.00185	0.502325	6.80499
19	Native	Mixed	< 1000	NE	4	339	Chirpine	26.8	18.1	20	0.0564104	6.24966	517.834	0.517834	10.3567	650	6731.85	6.73185	1.27232	0.679916	8.68408	3.11819	0.589338	0.295492	4.00302
19	Native	Mixed	< 1000	NE	5	340	Chirpine	21.8	17.5	20	0.0373253	5.81869	336.532	0.336532	6.73064	650	4374.91	4.37491	0.826859	0.441866	5.64364	2.02646	0.383001	0.192035	2.6015
19	Native	Mixed	< 1000	NE	6	341	Chirpine	28.2	19	20	0.062458	6.39622	599.574	0.599574	11.9915	650	7794.46	7.79446	1.47315	0.787241	10.0549	3.61039	0.682365	0.342135	4.63489
19	Native	Mixed	< 1000	NE	7	342	Chirpine	23.9	17.5	20	0.0448627	5.99559	401.655	0.401655	8.03311	650	5221.52	5.22152	0.986867	0.527373	6.73576	2.41861	0.457117	0.229196	3.10492
19	Native	Mixed	< 1000	NE	8	343	Chirpine	7.6	13.6	20	0.00453646	3.53917	34.4384	0.0344384	0.688768	650	447.699	0.447699	0.0846151	0.0452176	0.577532	0.207374	0.0391937	0.0196516	0.26622
19	Native	Mixed	< 1000	NE	9	344	Chirpine	40.5	28.8	20	0.128825	7.50921	1824.78	1.82478	36.4956	650	23722.1	23.7221	4.48348	2.39594	30.6016	10.9881	2.07675	1.04127	14.1061
19	Native	Mixed	< 1000	NE	10	345	Chirpine	26.3	18.8	20	0.0543252	6.25145	518.763	0.518763	10.3753	650	6743.92	6.74392	1.2746	0.681136	8.69965	3.12378	0.590395	0.296022	4.0102
19	Native	Mixed	< 1000	NE	11	346	Chirpine	15.8	16.7	20	0.0196067	5.15264	172.887	0.172887	3.45774	650	2247.53	2.24753	0.424783	0.227	2.89931	1.04106	0.196759	0.0986544	1.33647
19	Native	Mixed	< 1000	NE	12	347	Chirpine	19	7	20	0.0283529	4.63624	103.155	0.103155	2.06311	650	1341.02	1.34102	0.253453	0.135443	1.72991	0.62116	0.117399	0.0588635	0.797423
19	Native	Mixed	< 1000	NE	13	348	Chirpine	15.8	17.7	20	0.0196067	5.2109	183.26	0.18326	3.66519	650	2382.37	2.38237	0.450269	0.24062	3.07326	1.10352	0.208564	0.104573	1.41665
19	Native	Mixed	< 1000	NE	14	349	Chirpine	41	29	20	0.132025	7.53975	1881.36	1.88136	37.6272	650	24457.7	24.4577	4.6225	2.47022	31.5504	11.3288	2.14114	1.07356	14.5435
19	Native	Mixed	< 1000	NE	15	350	Chirpine	20	18	20	0.0314159	5.68115	293.288	0.293288	5.86576	650	3812.74	3.81274	0.720608	0.385087	4.91844	1.76606	0.333786	0.167359	2.26721
19	Native	Mixed	< 1000	NE	16	351	Chilaune	9.8	10	20	0.00754296	3.72433	41.4434	0.0414434	0.828868	690	571.919	0.571919	0.108093	0.0577638	0.737776	0.25765	0.0486958	0.0251388	0.331484
19	Native	Mixed	< 1000	NE	17	352	Chilaune	10.6	7.5	20	0.00882473	3.57704	35.7675	0.0357675	0.715351	690	493.592	0.493592	0.0932889	0.0498528	0.636734	0.222363	0.0420266	0.0216959	0.286086
19	Native	Mixed	< 1000	NE	18	353	Chilaune	8	7.5	20	0.00502655	3.06614	21.4588	0.0214588	0.429177	690	296.132	0.296132	0.0559689	0.0299093	0.38201	0.133407	0.025214	0.0130165	0.171638
19	Native	Mixed	< 1000	NE	19	354	Chilaune	8.6	8.5	20	0.0058088	3.3235	27.7573	0.0277573	0.555146	690	383.051	0.383051	0.0723966	0.0386881	0.494135	0.172564	0.0326147	0.0168371	0.222016
19	Native	Mixed	< 1000	NE	20	355	Chilaune	12.5	9.5	20	0.0122718	4.11446	61.2192	0.0612192	1.22438	690	844.825	0.844825	0.159672	0.0853274	1.08982	0.380594	0.0719322	0.0371345	0.489661
19	Native	Mixed	< 1000	NE	21	356	Chilaune	11.9	10	20	0.011122	4.07682	58.9576	0.0589576	1.17915	690	813.615	0.813615	0.153773	0.0821752	1.04956	0.366534	0.0692749	0.0357626	0.471571
19	Native	Mixed	< 1000	NE	22	357	Chilaune	13.1	9	20	0.0134782	4.14512	63.1253	0.0631253	1.26251	690	871.13	0.87113	0.164643	0.0879841	1.12376	0.392444	0.0741719	0.0382907	0.504906
19	Native	Mixed	< 1000	NE	23	358	Chilaune	10.3	9.5	20	0.00833229	3.76301	43.0778	0.0430778	0.861556	690	594.474	0.594474	0.112356	0.0600419	0.766871	0.267811	0.0506162	0.0261302	0.344557
19	Native	Mixed	< 1000	NE	24	359	Chilaune	8.4	9	20	0.00554177	3.33835	28.1726	0.0281726	0.563452	690	388.782	0.388782	0.0734797	0.0392669	0.501528	0.175146	0.0331026	0.017089	0.225338
19	Native	Mixed	< 1000	NE	25	360	Chilaune	13.9	10	20	0.0151747	4.35886	78.1678	0.0781678	1.56336	690	1078.72	1.07872	0.203877	0.10895	1.39154	0.485961	0.0918467	0.0474152	0.625223
19	Native	Mixed	< 1000	NE	26	361	Chilaune	10.3	11	20	0.00833229	3.91067	49.9323	0.0499323	0.998645	690	689.065	0.689065	0.130233	0.0695956	0.888894	0.310424	0.0586701	0.030288	0.399382
19	Native	Mixed	< 1000	NE	27	362	Chilaune	9.5	9	20	0.00708822	3.56176	35.2253	0.0352253	0.704506	690	486.109	0.486109	0.0918747	0.049097	0.627081	0.218992	0.0413895	0.021367	0.281749
19	Native	Mixed	< 1000	NE	28	363	Chilaune	10.3	11	20	0.00833229	3.91067	49.9323	0.0499323	0.998645	690	689.065	0.689065	0.130233	0.0695956	0.888894	0.310424	0.0586701	0.030288	0.399382
20	Native	Mixed	1000 - 1300	SE	1	364	Chirpine	27.8	22.5	20	0.0606987	6.53814	690.999	0.690999	13.82	650	8982.98	8.98298	1.69778	0.907281	11.588	4.16092	0.786413	0.394304	5.34163
20	Native	Mixed	1000 - 1300	SE	2	365	Chirpine	34	25.1	20	0.090792	7.03495	1135.63	1.13563	22.7127	650	14763.2	14.7632	2.79025	1.49109	19.0446	6.83833	1.29244	0.648026	8.7788
20	Native	Mixed	1000 - 1300	SE	3	366	Chirpine	33.3	24.8	20	0.087092	6.98288	1078.02	1.07802	21.5605	650	14014.3	14.0143	2.6487	1.41544	18.0784	6.49142	1.22688	0.615152	8.33345
20	Native	Mixed	1000 - 1300	SE	4	367	Chirpine	40.6	25.6	20	0.129462	7.39595	1629.37	1.62937	32.5875	650	21181.9	21.1819	4.00337	2.13937	27.3246	9.81144	1.85436	0.929769	12.5956
20	Native	Mixed	1000 - 1300	SE	5	368	Chirpine	36.8	25.3	20	0.106362	7.19512	1332.91	1.33291	26.6582	650	17327.8	17.3278	3.27495	1.75011	22.3529	8.02624	1.51696	0.760597	10.3038
20	Native	Mixed	1000 - 1300	SE	6	369	Chirpine	34	25	20	0.090792	7.03095	1131.1	1.1311	22.622	650	14704.3	14.7043	2.77911	1.48513	18.9686	6.81103	1.28729	0.64544	8.74376
20	Native	Mixed	1000 - 1300	SE	7	370	Chirpine	27.5	21.5	20	0.0593957	6.47172	646.594	0.646594	12.9319	650	8405.73	8.40573	1.58868	0.848978	10.8434	3.89353	0.735878	0.368966	4.99838
20	Native	Mixed	1000 - 1300	SE	8	371	Chilaune	10.6	7.5	20	0.00882473	3.57704	35.7675	0.0357675	0.715351	690	493.592	0.493592	0.0932889	0.0498528	0.636734	0.222363	0.0420266	0.0216959	0.286086
20	Native	Mixed	1000 - 1300	SE	9	372	Chilaune	9	9	20	0.00636173	3.46361	31.9319	0.0319319	0.638638	690	440.66	0.44066	0.0832848	0.0445067	0.568452	0.198517	0.0375198	0.0193693	0.255407
20	Native	Mixed	1000 - 1300	SE	10	373	Chilaune	8.6	8.5	20	0.0058088	3.3235	27.7573	0.0277573	0.555146	690	383.051	0.383051	0.0723966	0.0386881	0.494135	0.172564	0.0326147	0.0168371	0.222016
20	Native	Mixed	1000 - 1300	SE	11	374	Chilaune	14	9.5	20	0.0153938	4.32021	75.2044	0.0752044	1.50409	690	1037.82	1.03782	0.196148	0.10482	1.33879	0.467538	0.0883647	0.0456176	0.601521
21	Plantation	Monospecific	< 1000	NW	1	375	Chirpine	41.3	30.3	20	0.133965	7.59771	1993.62	1.99362	39.8724	650	25917.1	25.9171	4.89833	2.61762	33.433	12.0048	2.26891	1.13762	15.4113
21	Plantation	Monospecific	< 1000	NW	2	376	Chirpine	54.4	31	20	0.232428	8.15052	3465.17	3.46517	69.3035	650	45047.3	45.0473	8.51393	4.54977	58.111	20.8659	3.94365	1.97733	26.7869
21	Plantation	Monospecific	< 1000	NW	3	377	Chirpine	54.8	29	20	0.235858	8.09779	3287.2	3.2872	65.744	650	42733.6	42.7336	8.07665	4.3161	55.1264	19.7942	3.74111	1.87577	25.4111
21	Plantation	Monospecific	< 1000	NW	4	378	Chirpine	45.8	32.5	20	0.164748	7.86686	2609.37	2.60937	52.1874	650	33921.8	33.9218	6.41123	3.42611	43.7592	15.7126	2.96968	1.48899	20.1713
21	Plantation	Monospecific	< 1000	NW	5	379	Chirpine	48.8	31.7	20	0.187038	7.96393	2875.36	2.87536	57.5072	650	37379.7	37.3797	7.06476	3.77535	48.2198	17.3143	3.2724	1.64077	22.2274
21	Plantation	Monospecific	< 1000	NW	6	380	Chirpine	40.6	29.1	20	0.129462	7.52434	1852.59	1.85259	37.0518	650	24083.7	24.0837	4.55182	2.43245	31.068	11.1556	2.1084	1.05714	14.3211
21	Plantation	Monospecific	< 1000	NW	7	381	Chirpine	33	29.8	20	0.0855299	7.14949	1273.46	1.27346	25.4691	650	16554.9	16.5549	3.12888	1.67205	21.3559	7.66825	1.4493	0.726672	9.84422
22	Plantation	Monospecific	1000 - 1300	NW	1	382	Chirpine	24.5	16.8	20	0.0471435	6.00239	404.393	0.404393	8.08786	650	5257.11	5.25711	0.993594	0.530968	6.78167	2.43509	0.460233	0.230759	3.12608
22	Plantation	Monospecific	1000 - 1300	NW	2	383	Chirpine	17.5	14	20	0.0240528	5.17251	176.358	0.176358	3.52716	650	2292.65	2.29265	0.433311	0.231558	2.95752	1.06196	0.20071	0.100635	1.3633
22	Plantation	Monospecific	1000 - 1300	NW	3	384	Chirpine	26	17	20	0.0530929	6.12855	458.768	0.458768	9.17536	650	5963.99	5.96399	1.12719	0.602363	7.69354	2.76252	0.522116	0.261787	3.54642
22	Plantation	Monospecific	1000 - 1300	NW	4	385	Chirpine	50.7	34.1	20	0.201886	8.11052	3329.31	3.32931	66.5863	650	43281.1	43.2811	8.18012	4.37139	55.8326	20.0478	3.78903	1.89981	25.7366
22	Plantation	Monospecific	1000 - 1300	NW	5	386	Chirpine	18.9	9	20	0.0280552	4.87788	131.352	0.131352	2.62703	650	1707.57	1.70757	0.322731	0.172465	2.20277	0.790946	0.149489	0.0749531	1.01539
22	Plantation	Monospecific	1000 - 1300	NW	6	387	Chirpine	24	17.1	20	0.0452389	5.98046	395.622	0.395622	7.91244	650	5143.09	5.14309	0.972043	0.519452	6.63458	2.38228	0.45025	0.225754	3.05828
22	Plantation	Monospecific	1000 - 1300	NW	7	388	Chirpine	32.2	16	20	0.0814332	6.47918	651.439	0.651439	13.0288	650	8468.71	8.46871	1.60059	0.85534	10.9246	3.92271	0.741392	0.371731	5.03583
22	Plantation	Monospecific	1000 - 1300	NW	8	389	Chirpine	50	31.5	20	0.19635	8.00432	2993.86	2.99386	59.8772	650	38920.2	38.9202	7.35591	3.93094	50.207	18.0278	3.40726	1.70839	23.1435
22	Plantation	Monospecific	1000 - 1300	NW	9	390	Chirpine	25.8	14.5	20	0.0522792	5.95432	385.417	0.385417	7.70833	650	5010.42	5.01042	0.946969	0.506052	6.46344	2.32082	0.438636	0.21993	2.97939
22	Plantation	Monospecific	1000 - 1300	NW	10	391	Chirpine	16.8	9	20	0.0221671	4.65132	104.723	0.104723	2.09447	650	1361.4	1.3614	0.257305	0.137502	1.75621	0.630602	0.119184	0.0597582	0.809544
22	Plantation	Monospecific	1000 - 1300	NW	11	392	Chirpine	27.5	12.6	20	0.0593957	5.93635	378.55	0.37855	7.571	650	4921.15	4.92115	0.930097	0.497036	6.34828	2.27948	0.430821	0.216012	2.92631
22	Plantation	Monospecific	1000 - 1300	NW	12	393	Chirpine	26.8	17	20	0.0564104	6.18684	486.306	0.486306	9.72611	650	6321.97	6.32197	1.19485	0.638519	8.15535	2.92834	0.553456	0.277501	3.7593
22	Plantation	Monospecific	1000 - 1300	NW	13	394	Chirpine	24.2	16.3	20	0.0459961	5.94842	383.147	0.383147	7.66293	650	4980.91	4.98091	0.941391	0.503071	6.42537	2.30716	0.436052	0.218635	2.96184
22	Plantation	Monospecific	1000 - 1300	NW	14	395	Chirpine	22.7	14.5	20	0.0404708	5.7081	301.298	0.301298	6.02595	650	3916.87	3.91687	0.740288	0.395604	5.05276	1.81429	0.342901	0.171929	2.32912
22	Plantation	Monospecific	1000 - 1300	NW	15	396	Chirpine	20	16.5	20	0.0314159	5.59398	268.803	0.268803	5.37605	650	3494.44	3.49444	0.660448	0.352938	4.50782	1.61862	0.30592	0.153387	2.07793
23	Native	Monospecific	1000 - 1300	SW	1	397	Chirpine	31	21	20	0.0754768	6.67858	795.19	0.79519	15.9038	650	10337.5	10.3375	1.95378	1.04408	13.3353	4.78832	0.904992	0.453759	6.14707
23	Native	Monospecific	1000 - 1300	SW	2	398	Chirpine	24	16.5	20	0.0452389	5.94467	381.715	0.381715	7.63429	650	4962.29	4.96229	0.937873	0.501191	6.40135	2.29853	0.434423	0.217818	2.95077
23	Native	Monospecific	1000 - 1300	SW	3	399	Chirpine	29.6	22.5	20	0.0688134	6.65881	779.627	0.779627	15.5925	650	10135.1	10.1351	1.91554	1.02365	13.0743	4.6946	0.887279	0.444878	6.02676
23	Native	Monospecific	1000 - 1300	SW	4	400	Chirpine	27.9	21.5	20	0.0611362	6.4995	664.806	0.664806	13.2961	650	8642.48	8.64248	1.63343	0.872891	11.1488	4.0032	0.756604	0.379358	5.13916
23	Native	Monospecific	1000 - 1300	SW	5	401	Chirpine	26	16.2	20	0.0530929	6.08025	437.139	0.437139	8.74278	650	5682.81	5.68281	1.07405	0.573964	7.33082	2.63228	0.4975	0.249445	3.37922
23	Native	Monospecific	1000 - 1300	SW	6	402	Chirpine	24.1	19.5	20	0.0456167	6.12004	454.884	0.454884	9.09768	650	5913.49	5.91349	1.11765	0.597263	7.62841	2.73913	0.517696	0.25957	3.5164
23	Native	Monospecific	1000 - 1300	SW	7	403	Chirpine	17.1	14	20	0.0229658	5.12804	168.686	0.168686	3.37372	650	2192.92	2.19292	0.414461	0.221485	2.82886	1.01576	0.191979	0.0962573	1.304
23	Native	Monospecific	1000 - 1300	SW	8	404	Chirpine	39	22	20	0.119459	7.16678	1295.66	1.29566	25.9132	650	16843.6	16.8436	3.18344	1.7012	21.7282	7.80195	1.47457	0.739343	10.0159
23	Native	Monospecific	1000 - 1300	SW	9	405	Chirpine	27	24.1	20	0.0572555	6.5508	699.804	0.699804	13.9961	650	9097.45	9.09745	1.71942	0.918843	11.7357	4.21394	0.796435	0.399329	5.4097
23	Native	Monospecific	1000 - 1300	SW	10	406	Chirpine	35.9	24.3	20	0.101223	7.10709	1220.59	1.22059	24.4117	650	15867.6	15.8676	2.99898	1.60263	20.4692	7.34988	1.38913	0.696503	9.43551
23	Native	Monospecific	1000 - 1300	SW	11	407	Chirpine	20	12.5	20	0.0314159	5.31582	203.531	0.203531	4.07062	650	2645.9	2.6459	0.500076	0.267236	3.41322	1.22558	0.231635	0.116141	1.57336
23	Native	Monospecific	1000 - 1300	SW	12	408	Chirpine	17.6	13	20	0.0243285	5.10923	165.542	0.165542	3.31084	650	2152.05	2.15205	0.406737	0.217357	2.77614	0.996829	0.188401	0.0944633	1.27969
24	Plantation	Monospecific	> 1300	SW	1	409	Chirpine	32	20.8	20	0.0804248	6.73006	837.2	0.8372	16.744	650	10883.6	10.8836	2.057	1.09924	14.0398	5.04128	0.952802	0.477731	6.47181
24	Plantation	Monospecific	> 1300	SW	2	410	Chirpine	24	16.5	20	0.0452389	5.94467	381.715	0.381715	7.63429	650	4962.29	4.96229	0.937873	0.501191	6.40135	2.29853	0.434423	0.217818	2.95077
24	Plantation	Monospecific	> 1300	SW	3	411	Chirpine	29.6	22.5	20	0.0688134	6.65881	779.627	0.779627	15.5925	650	10135.1	10.1351	1.91554	1.02365	13.0743	4.6946	0.887279	0.444878	6.02676
24	Plantation	Monospecific	> 1300	SW	4	412	Chirpine	28.1	18	20	0.0620158	6.33522	564.091	0.564091	11.2818	650	7333.19	7.33319	1.38597	0.740652	9.45981	3.39673	0.641982	0.321887	4.3606
24	Plantation	Monospecific	> 1300	SW	5	413	Chirpine	27.9	21.5	20	0.0611362	6.4995	664.806	0.664806	13.2961	650	8642.48	8.64248	1.63343	0.872891	11.1488	4.0032	0.756604	0.379358	5.13916
24	Plantation	Monospecific	> 1300	SW	6	414	Chirpine	26	16.2	20	0.0530929	6.08025	437.139	0.437139	8.74278	650	5682.81	5.68281	1.07405	0.573964	7.33082	2.63228	0.4975	0.249445	3.37922
24	Plantation	Monospecific	> 1300	SW	7	415	Chirpine	24.1	19.5	20	0.0456167	6.12004	454.884	0.454884	9.09768	650	5913.49	5.91349	1.11765	0.597263	7.62841	2.73913	0.517696	0.25957	3.5164
24	Plantation	Monospecific	> 1300	SW	8	416	Chirpine	17.1	14	20	0.0229658	5.12804	168.686	0.168686	3.37372	650	2192.92	2.19292	0.414461	0.221485	2.82886	1.01576	0.191979	0.0962573	1.304
24	Plantation	Monospecific	> 1300	SW	9	417	Chirpine	35.9	24.3	20	0.101223	7.10709	1220.59	1.22059	24.4117	650	15867.6	15.8676	2.99898	1.60263	20.4692	7.34988	1.38913	0.696503	9.43551
24	Plantation	Monospecific	> 1300	SW	10	418	Chirpine	20	12.5	20	0.0314159	5.31582	203.531	0.203531	4.07062	650	2645.9	2.6459	0.500076	0.267236	3.41322	1.22558	0.231635	0.116141	1.57336
24	Plantation	Monospecific	> 1300	SW	11	419	Chirpine	28.1	18	20	0.0620158	6.33522	564.091	0.564091	11.2818	650	7333.19	7.33319	1.38597	0.740652	9.45981	3.39673	0.641982	0.321887	4.3606
24	Plantation	Monospecific	> 1300	SW	12	420	Chirpine	39	22	20	0.119459	7.16678	1295.66	1.29566	25.9132	650	16843.6	16.8436	3.18344	1.7012	21.7282	7.80195	1.47457	0.739343	10.0159
24	Plantation	Monospecific	> 1300	SW	13	421	Chirpine	27	24.1	20	0.0572555	6.5508	699.804	0.699804	13.9961	650	9097.45	9.09745	1.71942	0.918843	11.7357	4.21394	0.796435	0.399329	5.4097
24	Plantation	Monospecific	> 1300	SW	14	422	Chirpine	35.9	24.3	20	0.101223	7.10709	1220.59	1.22059	24.4117	650	15867.6	15.8676	2.99898	1.60263	20.4692	7.34988	1.38913	0.696503	9.43551

## Sheet: Sapling
Plot	Stand origin	Stand type	Altitude	Aspect	Tree_ID	Species	DBH (cm)	No. of tree/ha	BA_m2	Vol_m3	Density_kg/m3	Foliage biomass_kg	Branch biomass_kg	Stem biomass_kg	AGB Biomass_kg	AGB Biomass_t	AGB Biomass_t/ha	AGB C_t/ha				Plot	Stand type	Aspect	DBH (cm)			Plot	count	trees/ha
1	Plantation	Mixed	< 1000	SW	1	Chirpine	4.2	100	0.00138544	0	0	0.225401	0.0653504	0.95322	1.24397	0.00124397	0.124397	0.0584666				1	Mixed	SW	4.2			1	4	400
1	Plantation	Mixed	< 1000	SW	2	Chirpine	2.5	100	0.000490874	0	0	0.0815551	0.0161536	0.229638	0.327347	0.000327347	0.0327347	0.0153853				1	Mixed	SW	2.5			7	5	500
1	Plantation	Mixed	< 1000	SW	3	Chirpine	4.8	100	0.00180956	0	0	0.292815	0.0936435	1.37498	1.76144	0.00176144	0.176144	0.0827878				1	Mixed	SW	4.8			10	2	200
1	Plantation	Mixed	< 1000	SW	4	Chirpine	4.5	100	0.00159043	0	0	0.25803	0.0786989	1.15186	1.48859	0.00148859	0.148859	0.0699636				1	Mixed	SW	4.5			11	5	500
2	Plantation	Monospecific	< 1000	SE	1	Chirpine	4.8	100	0.00180956	0	0	0.292815	0.0936435	1.37498	1.76144	0.00176144	0.176144	0.0827878				5	Mixed	SE	3.6	Mixed		12
2	Plantation	Monospecific	< 1000	SE	2	Chilaune	4.9	100	0.00188574	0.00775773	690	0	0	0	5.35284	0.00535284	0.535284	0.251583				5	Mixed	SE	4.9	Mixed		15
2	Plantation	Monospecific	< 1000	SE	3	Chilaune	2.2	100	0.000380133	0.000892785	690	0	0	0	0.616021	0.000616021	0.0616021	0.028953				5	Mixed	SE	4.6	Mixed		18
2	Plantation	Monospecific	< 1000	SE	4	Chirpine	4.8	100	0.00180956	0	0	0.292815	0.0936435	1.37498	1.76144	0.00176144	0.176144	0.0827878				5	Mixed	SE	1.9	Mixed		19
2	Plantation	Monospecific	< 1000	SE	5	Chilaune	2.9	100	0.00066052	0.00188226	690	0	0	0	1.29876	0.00129876	0.129876	0.0610418				6	Mixed	NW	4.1	Mixed		20
3	Plantation	Monospecific	1000 - 1300	NE	1	Chirpine	3.9	100	0.00119459	0	0	0.194934	0.0535234	0.777844	1.0263	0.0010263	0.10263	0.0482362				6	Mixed	NW	1.9
3	Plantation	Monospecific	1000 - 1300	NE	2	Chirpine	4.7	100	0.00173494	0	0	0.28098	0.0884801	1.29781	1.66727	0.00166727	0.166727	0.0783619				6	Mixed	NW	4.7
4	Plantation	Monospecific	< 1000	SW	1	Chilaune	4.2	100	0.00138544	0.00511657	690	0	0	0	3.53043	0.00353043	0.353043	0.16593				6	Mixed	NW	4.5
4	Plantation	Monospecific	< 1000	SW	2	Chirpine	2.9	100	0.00066052	0	0	0.109084	0.0240945	0.345055	0.478233	0.000478233	0.0478233	0.0224769				6	Mixed	NW	2.8
4	Plantation	Monospecific	< 1000	SW	3	Chilaune	4.8	100	0.00180956	0.00733765	690	0	0	0	5.06298	0.00506298	0.506298	0.23796				6	Mixed	NW	4.4
4	Plantation	Monospecific	< 1000	SW	4	Chirpine	3.9	100	0.00119459	0	0	0.194934	0.0535234	0.777844	1.0263	0.0010263	0.10263	0.0482362				7	Mixed	SW	3.9
5	Plantation	Mixed	< 1000	SE	1	Chirpine	3.6	100	0.00101788	0	0	0.166636	0.0431415	0.624483	0.834261	0.000834261	0.0834261	0.0392103				7	Mixed	SW	4.2			12	5	500
5	Plantation	Mixed	< 1000	SE	2	Chirpine	4.9	100	0.00188574	0	0	0.304888	0.0989924	1.45501	1.85889	0.00185889	0.185889	0.0873678				7	Mixed	SW	4.4			15	5	500
5	Plantation	Mixed	< 1000	SE	3	Chirpine	4.6	100	0.0016619	0	0	0.269385	0.0834995	1.22345	1.57634	0.00157634	0.157634	0.0740879				7	Mixed	SW	3.2			18	6	600
5	Plantation	Mixed	< 1000	SE	4	Chirpine	1.9	100	0.000283529	0	0	0.0476321	0.0077123	0.108155	0.1635	0.0001635	0.01635	0.0076845				7	Mixed	SW	1.6			19	7	700
6	Plantation	Mixed	< 1000	NW	1	Chilaune	4.1	100	0.00132025	0.00479426	690	0	0	0	3.30804	0.00330804	0.330804	0.155478				10	Mixed	NE	3.5			20	5	500
6	Plantation	Mixed	< 1000	NW	2	Chilaune	1.9	100	0.000283529	0.000600953	690	0	0	0	0.414657	0.000414657	0.0414657	0.0194889				10	Mixed	NE	3.2
6	Plantation	Mixed	< 1000	NW	3	Chilaune	4.7	100	0.00173494	0.00693218	690	0	0	0	4.7832	0.0047832	0.47832	0.224811				11	Mixed	NW	4.6
6	Plantation	Mixed	< 1000	NW	4	Chirpine	4.5	100	0.00159043	0	0	0.25803	0.0786989	1.15186	1.48859	0.00148859	0.148859	0.0699636				11	Mixed	NW	2.8
6	Plantation	Mixed	< 1000	NW	5	Chilaune	2.8	100	0.000615752	0.00171211	690	0	0	0	1.18136	0.00118136	0.118136	0.0555238				11	Mixed	NW	3.9
6	Plantation	Mixed	< 1000	NW	6	Chirpine	4.4	100	0.00152053	0	0	0.246913	0.0740758	1.08298	1.40397	0.00140397	0.140397	0.0659868				11	Mixed	NW	2.6
7	Plantation	Mixed	1000 - 1300	SW	1	Chirpine	3.9	100	0.00119459	0	0	0.194934	0.0535234	0.777844	1.0263	0.0010263	0.10263	0.0482362				11	Mixed	NW	4.5
7	Plantation	Mixed	1000 - 1300	SW	2	Chilaune	4.2	100	0.00138544	0.00511657	690	0	0	0	3.53043	0.00353043	0.353043	0.16593				12	Mixed	NW	4.4
7	Plantation	Mixed	1000 - 1300	SW	3	Chirpine	4.4	100	0.00152053	0	0	0.246913	0.0740758	1.08298	1.40397	0.00140397	0.140397	0.0659868				12	Mixed	NW	4.1
7	Plantation	Mixed	1000 - 1300	SW	4	Chirpine	3.2	100	0.000804248	0	0	0.132292	0.0314117	0.452044	0.615748	0.000615748	0.0615748	0.0289401				12	Mixed	NW	2.8
7	Plantation	Mixed	1000 - 1300	SW	5	Chirpine	1.6	100	0.000201062	0	0	0.0340136	0.00485426	0.0674974	0.106365	0.000106365	0.0106365	0.00499916				12	Mixed	NW	4.5
8	Plantation	Monospecific	> 1300	SE	1	Chilaune	4.8	100	0.00180956	0.00733765	690	0	0	0	5.06298	0.00506298	0.506298	0.23796				12	Mixed	NW	2.8
8	Plantation	Monospecific	> 1300	SE	2	Chirpine	2.2	100	0.000380133	0	0	0.0634837	0.0114474	0.161707	0.236638	0.000236638	0.0236638	0.011122				14	Mixed	SW	2.6
8	Plantation	Monospecific	> 1300	SE	3	Chilaune	4.9	100	0.00188574	0.00775773	690	0	0	0	5.35284	0.00535284	0.535284	0.251583				14	Mixed	SW	4.9
8	Plantation	Monospecific	> 1300	SE	4	Chilaune	3.8	100	0.00113411	0.003905	690	0	0	0	2.69445	0.00269445	0.269445	0.126639				14	Mixed	SW	3.4
8	Plantation	Monospecific	> 1300	SE	5	Chirpine	4.2	100	0.00138544	0	0	0.225401	0.0653504	0.95322	1.24397	0.00124397	0.124397	0.0584666				14	Mixed	SW	3.8
8	Plantation	Monospecific	> 1300	SE	6	Chilaune	4.8	100	0.00180956	0.00733765	690	0	0	0	5.06298	0.00506298	0.506298	0.23796				14	Mixed	SW	4.9
9	Plantation	Monospecific	1000 - 1300	SE	1	Chirpine	4.6	100	0.0016619	0	0	0.269385	0.0834995	1.22345	1.57634	0.00157634	0.157634	0.0740879				14	Mixed	SW	3.4
9	Plantation	Monospecific	1000 - 1300	SE	2	Chirpine	4.4	100	0.00152053	0	0	0.246913	0.0740758	1.08298	1.40397	0.00140397	0.140397	0.0659868				15	Mixed	NE	3.2
9	Plantation	Monospecific	1000 - 1300	SE	3	Chirpine	4.2	100	0.00138544	0	0	0.225401	0.0653504	0.95322	1.24397	0.00124397	0.124397	0.0584666				15	Mixed	NE	3.4
10	Native	Mixed	1000 - 1300	NE	1	Chirpine	3.5	100	0.000962113	0	0	0.157687	0.0399886	0.578036	0.775711	0.000775711	0.0775711	0.0364584				15	Mixed	NE	3.4
10	Native	Mixed	1000 - 1300	NE	2	Chilaune	3.2	100	0.000804248	0.00245533	690	0	0	0	1.69418	0.00169418	0.169418	0.0796265				15	Mixed	NE	3.6
11	Native	Mixed	1000 - 1300	NW	1	Chirpine	4.6	100	0.0016619	0	0	0.269385	0.0834995	1.22345	1.57634	0.00157634	0.157634	0.0740879				15	Mixed	NE	3.8
11	Native	Mixed	1000 - 1300	NW	2	Chilaune	2.8	100	0.000615752	0.00171211	690	0	0	0	1.18136	0.00118136	0.118136	0.0555238				18	Mixed	SE	4.4
11	Native	Mixed	1000 - 1300	NW	3	Chirpine	3.9	100	0.00119459	0	0	0.194934	0.0535234	0.777844	1.0263	0.0010263	0.10263	0.0482362				18	Mixed	SE	2.1
11	Native	Mixed	1000 - 1300	NW	4	Chirpine	2.6	100	0.000530929	0	0	0.0880702	0.0179538	0.255726	0.36175	0.00036175	0.036175	0.0170023				18	Mixed	SE	3.9
11	Native	Mixed	1000 - 1300	NW	5	Chilaune	4.5	100	0.00159043	0.00616424	690	0	0	0	4.25332	0.00425332	0.425332	0.199906				18	Mixed	SE	3.8
12	Native	Mixed	> 1300	NW	1	Chilaune	4.4	100	0.00152053	0.00580133	690	0	0	0	4.00292	0.00400292	0.400292	0.188137				18	Mixed	SE	4.9
12	Native	Mixed	> 1300	NW	2	Chirpine	4.1	100	0.00132025	0	0	0.215005	0.0612428	0.892238	1.16849	0.00116849	0.116849	0.0549188				18	Mixed	SE	4.1
12	Native	Mixed	> 1300	NW	3	Chirpine	2.8	100	0.000615752	0	0	0.101835	0.0219211	0.313384	0.437139	0.000437139	0.0437139	0.0205456				19	Mixed	NE	3.3
12	Native	Mixed	> 1300	NW	4	Chirpine	4.5	100	0.00159043	0	0	0.25803	0.0786989	1.15186	1.48859	0.00148859	0.148859	0.0699636				19	Mixed	NE	3.6
12	Native	Mixed	> 1300	NW	5	Chirpine	2.8	100	0.000615752	0	0	0.101835	0.0219211	0.313384	0.437139	0.000437139	0.0437139	0.0205456				19	Mixed	NE	4.1
13	Native	Monospecific	> 1300	NW	1	Chirpine	3.3	100	0.000855299	0	0	0.140515	0.0341266	0.491864	0.666506	0.000666506	0.0666506	0.0313258				19	Mixed	NE	4.2
13	Native	Monospecific	> 1300	NW	2	Chirpine	4.8	100	0.00180956	0	0	0.292815	0.0936435	1.37498	1.76144	0.00176144	0.176144	0.0827878				19	Mixed	NE	2.3
13	Native	Monospecific	> 1300	NW	3	Chilaune	2.3	100	0.000415476	0.00100663	690	0	0	0	0.694576	0.000694576	0.0694576	0.0326451				19	Mixed	NE	4.9
13	Native	Monospecific	> 1300	NW	4	Chilaune	2.7	100	0.000572555	0.00155199	690	0	0	0	1.07087	0.00107087	0.107087	0.0503309				19	Mixed	NE	2.8
13	Native	Monospecific	> 1300	NW	5	Chirpine	4.1	100	0.00132025	0	0	0.215005	0.0612428	0.892238	1.16849	0.00116849	0.116849	0.0549188				20	Mixed	SE	3.2
13	Native	Monospecific	> 1300	NW	6	Chilaune	4.4	100	0.00152053	0.00580133	690	0	0	0	4.00292	0.00400292	0.400292	0.188137				20	Mixed	SE	4.9
13	Native	Monospecific	> 1300	NW	7	Chilaune	4.7	100	0.00173494	0.00693218	690	0	0	0	4.7832	0.0047832	0.47832	0.224811				20	Mixed	SE	4.7
13	Native	Monospecific	> 1300	NW	8	Chirpine	4.3	100	0.0014522	0	0	0.236037	0.0696272	1.01679	1.32245	0.00132245	0.132245	0.0621552				20	Mixed	SE	4.2
14	Native	Mixed	> 1300	SW	1	Chilaune	2.6	100	0.000530929	0.00140163	690	0	0	0	0.967125	0.000967125	0.0967125	0.0454549				20	Mixed	SE	4.7
14	Native	Mixed	> 1300	SW	2	Chilaune	4.9	100	0.00188574	0.00775773	690	0	0	0	5.35284	0.00535284	0.535284	0.251583
14	Native	Mixed	> 1300	SW	3	Chilaune	3.4	100	0.00090792	0.002892	690	0	0	0	1.99548	0.00199548	0.199548	0.0937876
14	Native	Mixed	> 1300	SW	4	Chilaune	3.8	100	0.00113411	0.003905	690	0	0	0	2.69445	0.00269445	0.269445	0.126639
14	Native	Mixed	> 1300	SW	5	Chilaune	4.9	100	0.00188574	0.00775773	690	0	0	0	5.35284	0.00535284	0.535284	0.251583
14	Native	Mixed	> 1300	SW	6	Chilaune	3.4	100	0.00090792	0.002892	690	0	0	0	1.99548	0.00199548	0.199548	0.0937876
15	Native	Mixed	> 1300	NE	1	Chilaune	3.2	100	0.000804248	0.00245533	690	0	0	0	1.69418	0.00169418	0.169418	0.0796265
15	Native	Mixed	> 1300	NE	2	Chilaune	3.4	100	0.00090792	0.002892	690	0	0	0	1.99548	0.00199548	0.199548	0.0937876
15	Native	Mixed	> 1300	NE	3	Chilaune	3.4	100	0.00090792	0.002892	690	0	0	0	1.99548	0.00199548	0.199548	0.0937876
15	Native	Mixed	> 1300	NE	4	Chilaune	3.6	100	0.00101788	0.0033746	690	0	0	0	2.32847	0.00232847	0.232847	0.109438
15	Native	Mixed	> 1300	NE	5	Chirpine	3.8	100	0.00113411	0	0	0.18526	0.049906	0.72434	0.959506	0.000959506	0.0959506	0.0450968
16	Native	Monospecific	> 1300	NE	1	Chilaune	2.8	100	0.000615752	0.00171211	690	0	0	0	1.18136	0.00118136	0.118136	0.0555238
16	Native	Monospecific	> 1300	NE	2	Chirpine	4.6	100	0.0016619	0	0	0.269385	0.0834995	1.22345	1.57634	0.00157634	0.157634	0.0740879
17	Native	Monospecific	< 1000	NE	1	Chirpine	2.2	100	0.000380133	0	0	0.0634837	0.0114474	0.161707	0.236638	0.000236638	0.0236638	0.011122
17	Native	Monospecific	< 1000	NE	2	Chirpine	2.9	100	0.00066052	0	0	0.109084	0.0240945	0.345055	0.478233	0.000478233	0.0478233	0.0224769
18	Native	Mixed	> 1300	SE	1	Chirpine	4.4	100	0.00152053	0	0	0.246913	0.0740758	1.08298	1.40397	0.00140397	0.140397	0.0659868
18	Native	Mixed	> 1300	SE	2	Chilaune	2.1	100	0.000346361	0.000787404	690	0	0	0	0.543309	0.000543309	0.0543309	0.0255355
18	Native	Mixed	> 1300	SE	3	Chirpine	3.9	100	0.00119459	0	0	0.194934	0.0535234	0.777844	1.0263	0.0010263	0.10263	0.0482362
18	Native	Mixed	> 1300	SE	4	Chirpine	3.8	100	0.00113411	0	0	0.18526	0.049906	0.72434	0.959506	0.000959506	0.0959506	0.0450968
18	Native	Mixed	> 1300	SE	5	Chilaune	4.9	100	0.00188574	0.00775773	690	0	0	0	5.35284	0.00535284	0.535284	0.251583
18	Native	Mixed	> 1300	SE	6	Chirpine	4.1	100	0.00132025	0	0	0.215005	0.0612428	0.892238	1.16849	0.00116849	0.116849	0.0549188
19	Native	Mixed	< 1000	NE	1	Chilaune	3.3	100	0.000855299	0.00266804	690	0	0	0	1.84095	0.00184095	0.184095	0.0865247
19	Native	Mixed	< 1000	NE	2	Chilaune	3.6	100	0.00101788	0.0033746	690	0	0	0	2.32847	0.00232847	0.232847	0.109438
19	Native	Mixed	< 1000	NE	3	Chirpine	4.1	100	0.00132025	0	0	0.215005	0.0612428	0.892238	1.16849	0.00116849	0.116849	0.0549188
19	Native	Mixed	< 1000	NE	4	Chilaune	4.2	100	0.00138544	0.00511657	690	0	0	0	3.53043	0.00353043	0.353043	0.16593
19	Native	Mixed	< 1000	NE	5	Chilaune	2.3	100	0.000415476	0.00100663	690	0	0	0	0.694576	0.000694576	0.0694576	0.0326451
19	Native	Mixed	< 1000	NE	6	Chilaune	4.9	100	0.00188574	0.00775773	690	0	0	0	5.35284	0.00535284	0.535284	0.251583
19	Native	Mixed	< 1000	NE	7	Chilaune	2.8	100	0.000615752	0.00171211	690	0	0	0	1.18136	0.00118136	0.118136	0.0555238
20	Native	Mixed	1000 - 1300	SE	1	Chirpine	3.2	100	0.000804248	0	0	0.132292	0.0314117	0.452044	0.615748	0.000615748	0.0615748	0.0289401
20	Native	Mixed	1000 - 1300	SE	2	Chilaune	4.9	100	0.00188574	0.00775773	690	0	0	0	5.35284	0.00535284	0.535284	0.251583
20	Native	Mixed	1000 - 1300	SE	3	Chilaune	4.7	100	0.00173494	0.00693218	690	0	0	0	4.7832	0.0047832	0.47832	0.224811
20	Native	Mixed	1000 - 1300	SE	4	Chirpine	4.2	100	0.00138544	0	0	0.225401	0.0653504	0.95322	1.24397	0.00124397	0.124397	0.0584666
20	Native	Mixed	1000 - 1300	SE	5	Chilaune	4.7	100	0.00173494	0.00693218	690	0	0	0	4.7832	0.0047832	0.47832	0.224811
21	Plantation	Monospecific	< 1000	NW	1	Chirpine	3.3	100	0.000855299	0	0	0.140515	0.0341266	0.491864	0.666506	0.000666506	0.0666506	0.0313258
21	Plantation	Monospecific	1000 - 1300	NW	2	Chirpine	4.8	100	0.00180956	0	0	0.292815	0.0936435	1.37498	1.76144	0.00176144	0.176144	0.0827878
21	Plantation	Monospecific	1000 - 1300	NW	3	Chilaune	2.3	100	0.000415476	0.00100663	690	0	0	0	0.694576	0.000694576	0.0694576	0.0326451
21	Plantation	Monospecific	1000 - 1300	NW	4	Chilaune	2.7	100	0.000572555	0.00155199	690	0	0	0	1.07087	0.00107087	0.107087	0.0503309
21	Plantation	Monospecific	1000 - 1300	NW	5	Chirpine	4.1	100	0.00132025	0	0	0.215005	0.0612428	0.892238	1.16849	0.00116849	0.116849	0.0549188
21	Plantation	Monospecific	1000 - 1300	NW	6	Chilaune	4.8	100	0.00180956	0.00733765	690	0	0	0	5.06298	0.00506298	0.506298	0.23796
21	Plantation	Monospecific	1000 - 1300	NW	7	Chirpine	4.2	100	0.00138544	0	0	0.225401	0.0653504	0.95322	1.24397	0.00124397	0.124397	0.0584666
21	Plantation	Monospecific	1000 - 1300	NW	8	Chirpine	4.4	100	0.00152053	0	0	0.246913	0.0740758	1.08298	1.40397	0.00140397	0.140397	0.0659868
21	Plantation	Monospecific	1000 - 1300	NW	9	Chilaune	2.1	100	0.000346361	0.000787404	690	0	0	0	0.543309	0.000543309	0.0543309	0.0255355
22	Plantation	Monospecific	1000 - 1300	NW	1	Chilaune	4.4	100	0.00152053	0.00580133	690	0	0	0	4.00292	0.00400292	0.400292	0.188137
22	Plantation	Monospecific	1000 - 1300	NW	2	Chilaune	4.7	100	0.00173494	0.00693218	690	0	0	0	4.7832	0.0047832	0.47832	0.224811
22	Plantation	Monospecific	1000 - 1300	NW	3	Chirpine	4.3	100	0.0014522	0	0	0.236037	0.0696272	1.01679	1.32245	0.00132245	0.132245	0.0621552
22	Plantation	Monospecific	1000 - 1300	NW	4	Chilaune	4.7	100	0.00173494	0.00693218	690	0	0	0	4.7832	0.0047832	0.47832	0.224811
22	Plantation	Monospecific	1000 - 1300	NW	5	Chirpine	4.3	100	0.0014522	0	0	0.236037	0.0696272	1.01679	1.32245	0.00132245	0.132245	0.0621552
23	Native	Monospecific	1000 - 1300	SW	1	Chilaune	4	100	0.00125664	0.00448505	690	0	0	0	3.09469	0.00309469	0.309469	0.14545
23	Native	Monospecific	1000 - 1300	SW	2	Chirpine	2.5	100	0.000490874	0	0	0.0815551	0.0161536	0.229638	0.327347	0.000327347	0.0327347	0.0153853
23	Native	Monospecific	1000 - 1300	SW	3	Chilaune	4.8	100	0.00180956	0.00733765	690	0	0	0	5.06298	0.00506298	0.506298	0.23796
23	Native	Monospecific	1000 - 1300	SW	4	Chirpine	4	100	0.00125664	0	0	0.204849	0.0573014	0.833795	1.09594	0.00109594	0.109594	0.0515094
24	Plantation	Monospecific	> 1300	SW	1	Chilaune	4.2	100	0.00138544	0.00511657	690	0	0	0	3.53043	0.00353043	0.353043	0.16593
24	Plantation	Monospecific	> 1300	SW	2	Chirpine	3.1	100	0.000754768	0	0	0.124313	0.0288367	0.414335	0.567484	0.000567484	0.0567484	0.0266718
24	Plantation	Monospecific	> 1300	SW	3	Chilaune	3.8	100	0.00113411	0.003905	690	0	0	0	2.69445	0.00269445	0.269445	0.126639
24	Plantation	Monospecific	> 1300	SW	4	Chirpine	3.9	100	0.00119459	0	0	0.194934	0.0535234	0.777844	1.0263	0.0010263	0.10263	0.0482362
24	Plantation	Monospecific	> 1300	SW	5	Chirpine	4.9	100	0.00188574	0	0	0.304888	0.0989924	1.45501	1.85889	0.00185889	0.185889	0.0873678

## Sheet: Understorey
Plot	Stand origin	Stand type	Altitude	Aspect	Green weight (g)	Sample weight (g)	Overn dry weight (g)	Factor	Total oven dry weight (g)	Total oven dry weight (t)	AGB (t/ha)	AGB C (t/ha)
1	Plantation	Mixed	< 1000	SW					0	0	0	0
2	Plantation	Monospecific	< 1000	SE	140	100	27.7	0.277	38.78	3.878e-05	0.3878	0.182266
3	Plantation	Monospecific	1000 - 1300	NE	345	100	34.8	0.348	120.06	0.00012006	1.2006	0.564282
4	Plantation	Monospecific	< 1000	SW					0	0	0	0
5	Plantation	Mixed	< 1000	SE	155	100	33.2	0.332	51.46	5.146e-05	0.5146	0.241862
6	Plantation	Mixed	< 1000	NW	190	100	33.6	0.336	63.84	6.384e-05	0.6384	0.300048
7	Plantation	Mixed	1000 - 1300	SW	125	100	40.8	0.408	51	5.1e-05	0.51	0.2397
8	Plantation	Monospecific	> 1300	SE	110	100	35.5	0.355	39.05	3.905e-05	0.3905	0.183535
9	Plantation	Monospecific	1000 - 1300	SE					0	0	0	0
10	Native	Mixed	1000 - 1300	NE	315	100	28	0.28	88.2	8.82e-05	0.882	0.41454
11	Native	Mixed	1000 - 1300	NW	280	100	34.6	0.346	96.88	9.688e-05	0.9688	0.455336
12	Native	Mixed	> 1300	NW	205	100	36.1	0.361	74.005	7.4005e-05	0.74005	0.347823
13	Native	Monospecific	> 1300	NW	130	100	33.8	0.338	43.94	4.394e-05	0.4394	0.206518
14	Native	Mixed	> 1300	SW	210	100	42.2	0.422	88.62	8.862e-05	0.8862	0.416514
15	Native	Mixed	> 1300	NE	110	100	32.5	0.325	35.75	3.575e-05	0.3575	0.168025
16	Native	Monospecific	> 1300	NE	120	100	35.4	0.354	42.48	4.248e-05	0.4248	0.199656
17	Native	Monospecific	< 1000	NE	175	100	35.3	0.353	61.775	6.1775e-05	0.61775	0.290342
18	Native	Mixed	> 1300	SE	220	100	32.8	0.328	72.16	7.216e-05	0.7216	0.339152
19	Native	Mixed	< 1000	NE	290	100	33	0.33	95.7	9.57e-05	0.957	0.44979
20	Native	Mixed	1000 - 1300	SE	150	100	33.5	0.335	50.25	5.025e-05	0.5025	0.236175
21	Plantation	Monospecific	< 1000	NW	270	100	33.2	0.332	89.64	8.964e-05	0.8964	0.421308
22	Plantation	Monospecific	1000 - 1300	NW	270	100	35.2	0.352	95.04	9.504e-05	0.9504	0.446688
23	Native	Monospecific	1000 - 1300	SW	115	100	33.1	0.331	38.065	3.8065e-05	0.38065	0.178905
24	Plantation	Monospecific	> 1300	SW	125	100	34	0.34	42.5	4.25e-05	0.425	0.19975

## Sheet: Summary
Plot No.	Stand Origin	Stand Type	Altitude	Aspect	Tree C t/ha	Sapling C t/ha	Understorey C t/ha	AGC_t/ha
1	Plantation	Mixed	< 1000	SW	46.5213	0.226603	0.106504	46.8544
2	Plantation	Monospecific	< 1000	SE	101.295	0.507154	0.238362	102.041
3	Plantation	Monospecific	1000 - 1300	NE	127.905	0.126598	0.0595011	128.091
4	Plantation	Monospecific	< 1000	SW	60.1101	0.474603	0.223064	60.8078
5	Plantation	Mixed	< 1000	SE	63.1033	0.20835	0.0979247	63.4096
6	Plantation	Mixed	< 1000	NW	90.2799	0.591252	0.277888	91.149
7	Plantation	Mixed	1000 - 1300	SW	53.6368	0.314092	0.147623	54.0985
8	Plantation	Monospecific	> 1300	SE	82.2214	0.923731	0.434154	83.5793
9	Plantation	Monospecific	1000 - 1300	SE	94.9352	0.198541	0.0933144	95.227
10	Native	Mixed	1000 - 1300	NE	152.373	0.116085	0.0545599	152.544
11	Native	Mixed	1000 - 1300	NW	83.5556	0.394756	0.185535	84.1359
12	Native	Mixed	> 1300	NW	69.9282	0.354111	0.166432	70.4487
13	Native	Monospecific	> 1300	NW	138.376	0.727111	0.341742	139.445
14	Native	Mixed	> 1300	SW	51.8269	0.862836	0.405533	53.0953
15	Native	Mixed	> 1300	NE	83.1265	0.421737	0.198216	83.7464
16	Native	Monospecific	> 1300	NE	142.056	0.129612	0.0609175	142.247
17	Native	Monospecific	< 1000	NE	171.693	0.0335989	0.0157915	171.742
18	Native	Mixed	> 1300	SE	45.21	0.491357	0.230938	45.9323
19	Native	Mixed	< 1000	NE	69.3305	0.756564	0.355585	70.4427
20	Native	Mixed	1000 - 1300	SE	60.4604	0.788611	0.370647	61.6197
21	Plantation	Monospecific	< 1000	NW	134.173	0.639957	0.30078	135.114
22	Plantation	Monospecific	1000 - 1300	NW	83.8688	0.762069	0.358172	84.9891
23	Native	Monospecific	1000 - 1300	SW	56.1775	0.450305	0.211643	56.8395
24	Plantation	Monospecific	> 1300	SW	73.3793	0.454845	0.213777	74.0479
Mean					88.981	0.456437	0.214525	89.652
